# Supplementary material for: Anti-inflammatory role of low-intensity pulsed ultrasound in inhibiting lipopolysaccharide-induced M1 polarization of RAW264.7 cells via Wnt2b/AXIN/β-catenin
Source: PeerJ journal article supplement (doi:10.7717/peerj.18448), 2024-11-13
Supplement: supplemental_files.zip [file CBA-wnt2b si MFI-concentration.xls]

## Sheet: CBA-rescue
PE-MFI	RAW	RAW+LPS	RAW+LPS+LIPUS	RAW+LPS+LIPUS+wnt2bsi1	RAW+LPS+LIPUS+wnt2bsi2	RAW+LPS+LIPUS+wnt2bsi3
IL6	928	64800	234	56900	66000	63100
	1096	65600	240	55700	68700	66100
	1096	62100	274	56300	66500	62800
PE-MFI
TNF	62500	79000	65000	88900	93900	87800
	60900	70600	64600	92700	89900	87200
	62500	65800	64800	91300	87000	88500
concentration
IL6( pg/mL )	RAW	RAW+LPS	RAW+LPS+LIPUS	RAW+LPS+LIPUS+wnt2bsi1	RAW+LPS+LIPUS+wnt2bsi2	RAW+LPS+LIPUS+wnt2bsi3
	49.7632	5203.23	2.64432	4645.23	5511.44	5231.96
	61.6149	5559.95	3.07794	4533.38	5774.52	5521.13
	61.6149	5569.66	5.32307	4589.23	5559.95	5203.23
concentration
TNF( pg/mL )	RAW	RAW+LPS	RAW+LPS+LIPUS	RAW+LPS+LIPUS+wnt2bsi1	RAW+LPS+LIPUS+wnt2bsi2	RAW+LPS+LIPUS+wnt2bsi3
	16689	22291.7	17506.4	25887.5	27770.1	25479.3
	16171.8	19378.2	17374.8	27314.2	26260.5	25257.6
	16689	17770.3	17440.6	26785.6	25183.8	25738.8

## Sheet: CBA-standard
	IL6		TNF
0	223		74.9
1:256	473		148
1:128	810		237
1:64	1307		408
1:32	2537		843
1:16	4890		1476
1:8	8623		2733
1:4	16500		5620
1:2	31400		10800
top	63500		22900
