# Supplementary material for: Anti-inflammatory role of low-intensity pulsed ultrasound in inhibiting lipopolysaccharide-induced M1 polarization of RAW264.7 cells via Wnt2b/AXIN/β-catenin
Source: PeerJ journal article supplement (doi:10.7717/peerj.18448), 2024-11-13
Supplement: supplemental_files.zip [file kegg.xls]

Term	database	ID	GeneRatio	BgRatio	Pvalue	Qvalue	geneIDs	geneNames	URL
Glycosphingolipid biosynthesis - lacto and neolacto series	KEGG PATHWAY	mmu00601	3/62	26/8979	0.000727907	0.114281426	14345/14347/14538	Fut4/Fut7/Gcnt2	http://www.genome.jp/kegg-bin/show_pathway?mmu00601/mmu:14345%09yellow/mmu:14347%09yellow/mmu:14538%09yellow
IL-17 signaling pathway	KEGG PATHWAY	mmu04657	4/62	93/8979	0.003804342	0.232880038	332110/234836/74180/14282	Mapk15/Il17c/Muc5b/Fosb	http://www.genome.jp/kegg-bin/show_pathway?mmu04657/mmu:332110%09yellow/mmu:234836%09yellow/mmu:74180%09yellow/mmu:14282%09yellow
Hippo signaling pathway	KEGG PATHWAY	mmu04390	5/62	157/8979	0.004449937	0.232880038	97064/22414/238057/16842/93737	Wwtr1/Wnt2b/Gdf7/Lef1/Pard6g	http://www.genome.jp/kegg-bin/show_pathway?mmu04390/mmu:97064%09yellow/mmu:22414%09red/mmu:238057%09yellow/mmu:16842%09yellow/mmu:93737%09yellow
Mineral absorption	KEGG PATHWAY	mmu04978	3/62	54/8979	0.006054515	0.237639722	244698/11979/67821	Hephl1/Atp7b/Atp1b4	http://www.genome.jp/kegg-bin/show_pathway?mmu04978/mmu:244698%09red/mmu:11979%09yellow/mmu:67821%09red
Nucleotide metabolism	KEGG PATHWAY	mmu01232	3/62	84/8979	0.020103825	0.530287882	633979/100862375/12496	Ak9/Entpd4b/Entpd2	http://www.genome.jp/kegg-bin/show_pathway?mmu01232/mmu:633979%09yellow/mmu:100862375%09red/mmu:12496%09yellow
Aldosterone-regulated sodium reabsorption	KEGG PATHWAY	mmu04960	2/62	38/8979	0.028121678	0.530287882	55948/67821	Sfn/Atp1b4	http://www.genome.jp/kegg-bin/show_pathway?mmu04960/mmu:55948%09yellow/mmu:67821%09red
Melanogenesis	KEGG PATHWAY	mmu04916	3/62	100/8979	0.031581333	0.530287882	17199/22414/16842	Mc1r/Wnt2b/Lef1	http://www.genome.jp/kegg-bin/show_pathway?mmu04916/mmu:17199%09yellow/mmu:22414%09red/mmu:16842%09yellow
Axon guidance	KEGG PATHWAY	mmu04360	4/62	181/8979	0.036035418	0.530287882	13638/19649/238057/93737	Efna3/Robo3/Gdf7/Pard6g	http://www.genome.jp/kegg-bin/show_pathway?mmu04360/mmu:13638%09red/mmu:19649%09red/mmu:238057%09yellow/mmu:93737%09yellow
Prion disease	KEGG PATHWAY	mmu05020	5/62	268/8979	0.037127052	0.530287882	14813/15511/407790/545486/84682	Grin2c/Hspa1b/Ndufa4l2/Tubb1/Cox4i2	http://www.genome.jp/kegg-bin/show_pathway?mmu05020/mmu:14813%09yellow/mmu:15511%09red/mmu:407790%09yellow/mmu:545486%09yellow/mmu:84682%09red
Protein digestion and absorption	KEGG PATHWAY	mmu04974	3/62	108/8979	0.038368345	0.530287882	12842/67821/16535	Col1a1/Atp1b4/Kcnq1	http://www.genome.jp/kegg-bin/show_pathway?mmu04974/mmu:12842%09yellow/mmu:67821%09red/mmu:16535%09yellow
Endocytosis	KEGG PATHWAY	mmu04144	5/62	272/8979	0.039183292	0.530287882	15511/14276/20408/630294/93737	Hspa1b/Folr2/Sh3gl3/Gm7030/Pard6g	http://www.genome.jp/kegg-bin/show_pathway?mmu04144/mmu:15511%09red/mmu:14276%09red/mmu:20408%09red/mmu:630294%09red/mmu:93737%09yellow
Cocaine addiction	KEGG PATHWAY	mmu05030	2/62	48/8979	0.043190286	0.530287882	14813/14282	Grin2c/Fosb	http://www.genome.jp/kegg-bin/show_pathway?mmu05030/mmu:14813%09yellow/mmu:14282%09yellow
Pancreatic secretion	KEGG PATHWAY	mmu04972	3/62	114/8979	0.043909188	0.530287882	12425/67821/16535	Cckar/Atp1b4/Kcnq1	http://www.genome.jp/kegg-bin/show_pathway?mmu04972/mmu:12425%09red/mmu:67821%09red/mmu:16535%09yellow
Cytokine-cytokine receptor interaction	KEGG PATHWAY	mmu04060	5/62	292/8979	0.050505856	0.566387101	50931/238057/234836/14561/12771	Il27ra/Gdf7/Il17c/Gdf11/Ccr3	http://www.genome.jp/kegg-bin/show_pathway?mmu04060/mmu:50931%09yellow/mmu:238057%09yellow/mmu:234836%09yellow/mmu:14561%09red/mmu:12771%09yellow
Pyrimidine metabolism	KEGG PATHWAY	mmu00240	2/62	56/8979	0.056945772	0.596032412	633979/100862375	Ak9/Entpd4b	http://www.genome.jp/kegg-bin/show_pathway?mmu00240/mmu:633979%09yellow/mmu:100862375%09red
Purine metabolism	KEGG PATHWAY	mmu00230	3/62	134/8979	0.065067904	0.603579914	633979/100862375/12496	Ak9/Entpd4b/Entpd2	http://www.genome.jp/kegg-bin/show_pathway?mmu00230/mmu:633979%09yellow/mmu:100862375%09red/mmu:12496%09yellow
Basal cell carcinoma	KEGG PATHWAY	mmu05217	2/62	63/8979	0.070056932	0.603579914	22414/16842	Wnt2b/Lef1	http://www.genome.jp/kegg-bin/show_pathway?mmu05217/mmu:22414%09red/mmu:16842%09yellow
Amphetamine addiction	KEGG PATHWAY	mmu05031	2/62	69/8979	0.081999037	0.603579914	14813/14282	Grin2c/Fosb	http://www.genome.jp/kegg-bin/show_pathway?mmu05031/mmu:14813%09yellow/mmu:14282%09yellow
Acute myeloid leukemia	KEGG PATHWAY	mmu05221	2/62	70/8979	0.084047228	0.603579914	110794/16842	Cebpe/Lef1	http://www.genome.jp/kegg-bin/show_pathway?mmu05221/mmu:110794%09red/mmu:16842%09yellow
Gastric cancer	KEGG PATHWAY	mmu05226	3/62	150/8979	0.084791399	0.603579914	22414/16842/21748	Wnt2b/Lef1/Terc	http://www.genome.jp/kegg-bin/show_pathway?mmu05226/mmu:22414%09red/mmu:16842%09yellow/mmu:21748%09yellow
Adherens junction	KEGG PATHWAY	mmu04520	2/62	71/8979	0.08611111	0.603579914	83767/16842	Wasf1/Lef1	http://www.genome.jp/kegg-bin/show_pathway?mmu04520/mmu:83767%09yellow/mmu:16842%09yellow
Thyroid hormone synthesis	KEGG PATHWAY	mmu04918	2/62	74/8979	0.092393852	0.603579914	67821/214593	Atp1b4/Duox2	http://www.genome.jp/kegg-bin/show_pathway?mmu04918/mmu:67821%09red/mmu:214593%09yellow
Gastric acid secretion	KEGG PATHWAY	mmu04971	2/62	75/8979	0.094517469	0.603579914	67821/16535	Atp1b4/Kcnq1	http://www.genome.jp/kegg-bin/show_pathway?mmu04971/mmu:67821%09red/mmu:16535%09yellow
Arrhythmogenic right ventricular cardiomyopathy	KEGG PATHWAY	mmu05412	2/62	77/8979	0.098806994	0.603579914	16842/16400	Lef1/Itga3	http://www.genome.jp/kegg-bin/show_pathway?mmu05412/mmu:16842%09yellow/mmu:16400%09yellow
Cushing syndrome	KEGG PATHWAY	mmu04934	3/62	162/8979	0.101069355	0.603579914	77037/22414/16842	Mrap/Wnt2b/Lef1	http://www.genome.jp/kegg-bin/show_pathway?mmu04934/mmu:77037%09yellow/mmu:22414%09red/mmu:16842%09yellow
Human papillomavirus infection	KEGG PATHWAY	mmu05165	5/62	362/8979	0.103898171	0.603579914	12842/22414/630294/16400/93737	Col1a1/Wnt2b/Gm7030/Itga3/Pard6g	http://www.genome.jp/kegg-bin/show_pathway?mmu05165/mmu:12842%09yellow/mmu:22414%09red/mmu:630294%09red/mmu:16400%09yellow/mmu:93737%09yellow
Salivary secretion	KEGG PATHWAY	mmu04970	2/62	85/8979	0.116487604	0.603579914	67821/74180	Atp1b4/Muc5b	http://www.genome.jp/kegg-bin/show_pathway?mmu04970/mmu:67821%09red/mmu:74180%09yellow
Hepatocellular carcinoma	KEGG PATHWAY	mmu05225	3/62	174/8979	0.118502724	0.603579914	22414/16842/21748	Wnt2b/Lef1/Terc	http://www.genome.jp/kegg-bin/show_pathway?mmu05225/mmu:22414%09red/mmu:16842%09yellow/mmu:21748%09yellow
Insulin secretion	KEGG PATHWAY	mmu04911	2/62	86/8979	0.118751959	0.603579914	12425/67821	Cckar/Atp1b4	http://www.genome.jp/kegg-bin/show_pathway?mmu04911/mmu:12425%09red/mmu:67821%09red
Cardiac muscle contraction	KEGG PATHWAY	mmu04260	2/62	87/8979	0.121027496	0.603579914	67821/84682	Atp1b4/Cox4i2	http://www.genome.jp/kegg-bin/show_pathway?mmu04260/mmu:67821%09red/mmu:84682%09red
ECM-receptor interaction	KEGG PATHWAY	mmu04512	2/62	88/8979	0.12331396	0.603579914	12842/16400	Col1a1/Itga3	http://www.genome.jp/kegg-bin/show_pathway?mmu04512/mmu:12842%09yellow/mmu:16400%09yellow
Alzheimer disease	KEGG PATHWAY	mmu05010	5/62	383/8979	0.123929166	0.603579914	14813/407790/545486/22414/84682	Grin2c/Ndufa4l2/Tubb1/Wnt2b/Cox4i2	http://www.genome.jp/kegg-bin/show_pathway?mmu05010/mmu:14813%09yellow/mmu:407790%09yellow/mmu:545486%09yellow/mmu:22414%09red/mmu:84682%09red
Antigen processing and presentation	KEGG PATHWAY	mmu04612	2/62	90/8979	0.127918659	0.603579914	15511/630294	Hspa1b/Gm7030	http://www.genome.jp/kegg-bin/show_pathway?mmu04612/mmu:15511%09red/mmu:630294%09red
Phagosome	KEGG PATHWAY	mmu04145	3/62	182/8979	0.130711574	0.603579914	71693/545486/630294	Colec11/Tubb1/Gm7030	http://www.genome.jp/kegg-bin/show_pathway?mmu04145/mmu:71693%09yellow/mmu:545486%09yellow/mmu:630294%09red
TGF-beta signaling pathway	KEGG PATHWAY	mmu04350	2/62	95/8979	0.139604275	0.617274965	14313/238057	Fst/Gdf7	http://www.genome.jp/kegg-bin/show_pathway?mmu04350/mmu:14313%09red/mmu:238057%09yellow
Proximal tubule bicarbonate reclamation	KEGG PATHWAY	mmu04964	1/62	22/8979	0.141540756	0.617274965	67821	Atp1b4	http://www.genome.jp/kegg-bin/show_pathway?mmu04964/mmu:67821%09red
Mannose type O-glycan biosynthesis	KEGG PATHWAY	mmu00515	1/62	23/8979	0.147482977	0.625806146	14345	Fut4	http://www.genome.jp/kegg-bin/show_pathway?mmu00515/mmu:14345%09yellow
AGE-RAGE signaling pathway in diabetic complications	KEGG PATHWAY	mmu04933	2/62	101/8979	0.153921119	0.635937257	12842/18799	Col1a1/Plcd1	http://www.genome.jp/kegg-bin/show_pathway?mmu04933/mmu:12842%09yellow/mmu:18799%09red
Histidine metabolism	KEGG PATHWAY	mmu00340	1/62	26/8979	0.165067885	0.638652953	107239	Carns1	http://www.genome.jp/kegg-bin/show_pathway?mmu00340/mmu:107239%09yellow
Glycosylphosphatidylinositol (GPI)-anchor biosynthesis	KEGG PATHWAY	mmu00563	1/62	26/8979	0.165067885	0.638652953	239827	Pigz	http://www.genome.jp/kegg-bin/show_pathway?mmu00563/mmu:239827%09yellow
Proteoglycans in cancer	KEGG PATHWAY	mmu05205	3/62	205/8979	0.168085039	0.638652953	12842/22414/13345	Col1a1/Wnt2b/Twist2	http://www.genome.jp/kegg-bin/show_pathway?mmu05205/mmu:12842%09yellow/mmu:22414%09red/mmu:13345%09yellow
Hippo signaling pathway - multiple species	KEGG PATHWAY	mmu04392	1/62	27/8979	0.170849835	0.638652953	97064	Wwtr1	http://www.genome.jp/kegg-bin/show_pathway?mmu04392/mmu:97064%09yellow
Diabetic cardiomyopathy	KEGG PATHWAY	mmu05415	3/62	211/8979	0.178317249	0.650464561	12842/407790/84682	Col1a1/Ndufa4l2/Cox4i2	http://www.genome.jp/kegg-bin/show_pathway?mmu05415/mmu:12842%09yellow/mmu:407790%09yellow/mmu:84682%09red
Antifolate resistance	KEGG PATHWAY	mmu01523	1/62	29/8979	0.1822958	0.650464561	14276	Folr2	http://www.genome.jp/kegg-bin/show_pathway?mmu01523/mmu:14276%09red
cAMP signaling pathway	KEGG PATHWAY	mmu04024	3/62	220/8979	0.193982999	0.657624029	14813/20609/67821	Grin2c/Sstr5/Atp1b4	http://www.genome.jp/kegg-bin/show_pathway?mmu04024/mmu:14813%09yellow/mmu:20609%09red/mmu:67821%09red
beta-Alanine metabolism	KEGG PATHWAY	mmu00410	1/62	32/8979	0.199173853	0.657624029	107239	Carns1	http://www.genome.jp/kegg-bin/show_pathway?mmu00410/mmu:107239%09yellow
Thyroid hormone signaling pathway	KEGG PATHWAY	mmu04919	2/62	120/8979	0.200863074	0.657624029	18799/67821	Plcd1/Atp1b4	http://www.genome.jp/kegg-bin/show_pathway?mmu04919/mmu:18799%09red/mmu:67821%09red
Kaposi sarcoma-associated herpesvirus infection	KEGG PATHWAY	mmu05167	3/62	224/8979	0.201057028	0.657624029	16842/630294/12771	Lef1/Gm7030/Ccr3	http://www.genome.jp/kegg-bin/show_pathway?mmu05167/mmu:16842%09yellow/mmu:630294%09red/mmu:12771%09yellow
Pathways of neurodegeneration - multiple diseases	KEGG PATHWAY	mmu05022	5/62	471/8979	0.2245125	0.662040705	14813/407790/545486/22414/84682	Grin2c/Ndufa4l2/Tubb1/Wnt2b/Cox4i2	http://www.genome.jp/kegg-bin/show_pathway?mmu05022/mmu:14813%09yellow/mmu:407790%09yellow/mmu:545486%09yellow/mmu:22414%09red/mmu:84682%09red
Thyroid cancer	KEGG PATHWAY	mmu05216	1/62	37/8979	0.226545394	0.662040705	16842	Lef1	http://www.genome.jp/kegg-bin/show_pathway?mmu05216/mmu:16842%09yellow
Calcium signaling pathway	KEGG PATHWAY	mmu04020	3/62	240/8979	0.229939872	0.662040705	14813/18799/12425	Grin2c/Plcd1/Cckar	http://www.genome.jp/kegg-bin/show_pathway?mmu04020/mmu:14813%09yellow/mmu:18799%09red/mmu:12425%09red
Oxidative phosphorylation	KEGG PATHWAY	mmu00190	2/62	135/8979	0.2390049	0.662040705	407790/84682	Ndufa4l2/Cox4i2	http://www.genome.jp/kegg-bin/show_pathway?mmu00190/mmu:407790%09yellow/mmu:84682%09red
Tyrosine metabolism	KEGG PATHWAY	mmu00350	1/62	40/8979	0.242524286	0.662040705	11761	Aox1	http://www.genome.jp/kegg-bin/show_pathway?mmu00350/mmu:11761%09red
Nicotine addiction	KEGG PATHWAY	mmu05033	1/62	40/8979	0.242524286	0.662040705	14813	Grin2c	http://www.genome.jp/kegg-bin/show_pathway?mmu05033/mmu:14813%09yellow
Nicotinate and nicotinamide metabolism	KEGG PATHWAY	mmu00760	1/62	41/8979	0.247778061	0.662040705	11761	Aox1	http://www.genome.jp/kegg-bin/show_pathway?mmu00760/mmu:11761%09red
Homologous recombination	KEGG PATHWAY	mmu03440	1/62	41/8979	0.247778061	0.662040705	20962	Sycp3	http://www.genome.jp/kegg-bin/show_pathway?mmu03440/mmu:20962%09red
Amyotrophic lateral sclerosis	KEGG PATHWAY	mmu05014	4/62	369/8979	0.250239901	0.662040705	14813/407790/545486/84682	Grin2c/Ndufa4l2/Tubb1/Cox4i2	http://www.genome.jp/kegg-bin/show_pathway?mmu05014/mmu:14813%09yellow/mmu:407790%09yellow/mmu:545486%09yellow/mmu:84682%09red
Alcoholic liver disease	KEGG PATHWAY	mmu04936	2/62	141/8979	0.254391482	0.662040705	12268/16842	C4b/Lef1	http://www.genome.jp/kegg-bin/show_pathway?mmu04936/mmu:12268%09yellow/mmu:16842%09yellow
Spinocerebellar ataxia	KEGG PATHWAY	mmu05017	2/62	141/8979	0.254391482	0.662040705	65115/14813	Bean1/Grin2c	http://www.genome.jp/kegg-bin/show_pathway?mmu05017/mmu:65115%09red/mmu:14813%09yellow
Porphyrin metabolism	KEGG PATHWAY	mmu00860	1/62	43/8979	0.258178284	0.662040705	244698	Hephl1	http://www.genome.jp/kegg-bin/show_pathway?mmu00860/mmu:244698%09red
Breast cancer	KEGG PATHWAY	mmu05224	2/62	147/8979	0.26980648	0.662040705	22414/16842	Wnt2b/Lef1	http://www.genome.jp/kegg-bin/show_pathway?mmu05224/mmu:22414%09red/mmu:16842%09yellow
Parkinson disease	KEGG PATHWAY	mmu05012	3/62	264/8979	0.274591508	0.662040705	407790/545486/84682	Ndufa4l2/Tubb1/Cox4i2	http://www.genome.jp/kegg-bin/show_pathway?mmu05012/mmu:407790%09yellow/mmu:545486%09yellow/mmu:84682%09red
Neuroactive ligand-receptor interaction	KEGG PATHWAY	mmu04080	4/62	386/8979	0.27631352	0.662040705	14813/17199/20609/12425	Grin2c/Mc1r/Sstr5/Cckar	http://www.genome.jp/kegg-bin/show_pathway?mmu04080/mmu:14813%09yellow/mmu:17199%09yellow/mmu:20609%09red/mmu:12425%09red
Adrenergic signaling in cardiomyocytes	KEGG PATHWAY	mmu04261	2/62	152/8979	0.282654198	0.662040705	67821/16535	Atp1b4/Kcnq1	http://www.genome.jp/kegg-bin/show_pathway?mmu04261/mmu:67821%09red/mmu:16535%09yellow
Carbohydrate digestion and absorption	KEGG PATHWAY	mmu04973	1/62	48/8979	0.283563889	0.662040705	67821	Atp1b4	http://www.genome.jp/kegg-bin/show_pathway?mmu04973/mmu:67821%09red
Non-alcoholic fatty liver disease	KEGG PATHWAY	mmu04932	2/62	156/8979	0.292922937	0.662040705	407790/84682	Ndufa4l2/Cox4i2	http://www.genome.jp/kegg-bin/show_pathway?mmu04932/mmu:407790%09yellow/mmu:84682%09red
Tryptophan metabolism	KEGG PATHWAY	mmu00380	1/62	52/8979	0.303255275	0.662040705	11761	Aox1	http://www.genome.jp/kegg-bin/show_pathway?mmu00380/mmu:11761%09red
Arginine and proline metabolism	KEGG PATHWAY	mmu00330	1/62	54/8979	0.312900299	0.662040705	107239	Carns1	http://www.genome.jp/kegg-bin/show_pathway?mmu00330/mmu:107239%09yellow
Sphingolipid metabolism	KEGG PATHWAY	mmu00600	1/62	54/8979	0.312900299	0.662040705	74442	Sgms2	http://www.genome.jp/kegg-bin/show_pathway?mmu00600/mmu:74442%09red
JAK-STAT signaling pathway	KEGG PATHWAY	mmu04630	2/62	168/8979	0.323606153	0.662040705	50931/11761	Il27ra/Aox1	http://www.genome.jp/kegg-bin/show_pathway?mmu04630/mmu:50931%09yellow/mmu:11761%09red
Wnt signaling pathway	KEGG PATHWAY	mmu04310	2/62	169/8979	0.326151071	0.662040705	22414/16842	Wnt2b/Lef1	http://www.genome.jp/kegg-bin/show_pathway?mmu04310/mmu:22414%09red/mmu:16842%09yellow
Valine, leucine and isoleucine degradation	KEGG PATHWAY	mmu00280	1/62	57/8979	0.327122027	0.662040705	11761	Aox1	http://www.genome.jp/kegg-bin/show_pathway?mmu00280/mmu:11761%09red
Endometrial cancer	KEGG PATHWAY	mmu05213	1/62	58/8979	0.331797933	0.662040705	16842	Lef1	http://www.genome.jp/kegg-bin/show_pathway?mmu05213/mmu:16842%09yellow
Cell adhesion molecules	KEGG PATHWAY	mmu04514	2/62	174/8979	0.338839599	0.662040705	13003/630294	Vcan/Gm7030	http://www.genome.jp/kegg-bin/show_pathway?mmu04514/mmu:13003%09red/mmu:630294%09red
Endocrine and other factor-regulated calcium reabsorption	KEGG PATHWAY	mmu04961	1/62	61/8979	0.345634673	0.662040705	67821	Atp1b4	http://www.genome.jp/kegg-bin/show_pathway?mmu04961/mmu:67821%09red
Legionellosis	KEGG PATHWAY	mmu05134	1/62	61/8979	0.345634673	0.662040705	15511	Hspa1b	http://www.genome.jp/kegg-bin/show_pathway?mmu05134/mmu:15511%09red
Huntington disease	KEGG PATHWAY	mmu05016	3/62	302/8979	0.346821543	0.662040705	407790/545486/84682	Ndufa4l2/Tubb1/Cox4i2	http://www.genome.jp/kegg-bin/show_pathway?mmu05016/mmu:407790%09yellow/mmu:545486%09yellow/mmu:84682%09red
MicroRNAs in cancer	KEGG PATHWAY	mmu05206	3/62	303/8979	0.348726861	0.662040705	13638/387189/140486	Efna3/Mir194-1/Igf2bp1	http://www.genome.jp/kegg-bin/show_pathway?mmu05206/mmu:13638%09red/mmu:387189%09yellow/mmu:140486%09red
Longevity regulating pathway - multiple species	KEGG PATHWAY	mmu04213	1/62	62/8979	0.350183972	0.662040705	15511	Hspa1b	http://www.genome.jp/kegg-bin/show_pathway?mmu04213/mmu:15511%09red
Ovarian steroidogenesis	KEGG PATHWAY	mmu04913	1/62	63/8979	0.35470215	0.662040705	15485	Hsd17b1	http://www.genome.jp/kegg-bin/show_pathway?mmu04913/mmu:15485%09yellow
Allograft rejection	KEGG PATHWAY	mmu05330	1/62	63/8979	0.35470215	0.662040705	630294	Gm7030	http://www.genome.jp/kegg-bin/show_pathway?mmu05330/mmu:630294%09red
Graft-versus-host disease	KEGG PATHWAY	mmu05332	1/62	63/8979	0.35470215	0.662040705	630294	Gm7030	http://www.genome.jp/kegg-bin/show_pathway?mmu05332/mmu:630294%09red
Long-term potentiation	KEGG PATHWAY	mmu04720	1/62	67/8979	0.372467819	0.662040705	14813	Grin2c	http://www.genome.jp/kegg-bin/show_pathway?mmu04720/mmu:14813%09yellow
Type I diabetes mellitus	KEGG PATHWAY	mmu04940	1/62	70/8979	0.385475423	0.662040705	630294	Gm7030	http://www.genome.jp/kegg-bin/show_pathway?mmu04940/mmu:630294%09red
Drug metabolism - cytochrome P450	KEGG PATHWAY	mmu00982	1/62	71/8979	0.389752056	0.662040705	11761	Aox1	http://www.genome.jp/kegg-bin/show_pathway?mmu00982/mmu:11761%09red
Adipocytokine signaling pathway	KEGG PATHWAY	mmu04920	1/62	71/8979	0.389752056	0.662040705	11604	Agrp	http://www.genome.jp/kegg-bin/show_pathway?mmu04920/mmu:11604%09red
Inositol phosphate metabolism	KEGG PATHWAY	mmu00562	1/62	72/8979	0.393999404	0.662040705	18799	Plcd1	http://www.genome.jp/kegg-bin/show_pathway?mmu00562/mmu:18799%09red
p53 signaling pathway	KEGG PATHWAY	mmu04115	1/62	72/8979	0.393999404	0.662040705	55948	Sfn	http://www.genome.jp/kegg-bin/show_pathway?mmu04115/mmu:55948%09yellow
Cortisol synthesis and secretion	KEGG PATHWAY	mmu04927	1/62	72/8979	0.393999404	0.662040705	77037	Mrap	http://www.genome.jp/kegg-bin/show_pathway?mmu04927/mmu:77037%09yellow
Focal adhesion	KEGG PATHWAY	mmu04510	2/62	201/8979	0.405946112	0.662040705	12842/16400	Col1a1/Itga3	http://www.genome.jp/kegg-bin/show_pathway?mmu04510/mmu:12842%09yellow/mmu:16400%09yellow
Bacterial invasion of epithelial cells	KEGG PATHWAY	mmu05100	1/62	76/8979	0.410699866	0.662040705	83767	Wasf1	http://www.genome.jp/kegg-bin/show_pathway?mmu05100/mmu:83767%09yellow
Pertussis	KEGG PATHWAY	mmu05133	1/62	77/8979	0.414803719	0.662040705	12268	C4b	http://www.genome.jp/kegg-bin/show_pathway?mmu05133/mmu:12268%09yellow
Alcoholism	KEGG PATHWAY	mmu05034	2/62	205/8979	0.415634619	0.662040705	14813/14282	Grin2c/Fosb	http://www.genome.jp/kegg-bin/show_pathway?mmu05034/mmu:14813%09yellow/mmu:14282%09yellow
Autoimmune thyroid disease	KEGG PATHWAY	mmu05320	1/62	79/8979	0.422927252	0.662040705	630294	Gm7030	http://www.genome.jp/kegg-bin/show_pathway?mmu05320/mmu:630294%09red
Platinum drug resistance	KEGG PATHWAY	mmu01524	1/62	80/8979	0.42694731	0.662040705	11979	Atp7b	http://www.genome.jp/kegg-bin/show_pathway?mmu01524/mmu:11979%09yellow
Rap1 signaling pathway	KEGG PATHWAY	mmu04015	2/62	214/8979	0.437150798	0.662040705	13638/93737	Efna3/Pard6g	http://www.genome.jp/kegg-bin/show_pathway?mmu04015/mmu:13638%09red/mmu:93737%09yellow
Gap junction	KEGG PATHWAY	mmu04540	1/62	86/8979	0.450495432	0.662040705	545486	Tubb1	http://www.genome.jp/kegg-bin/show_pathway?mmu04540/mmu:545486%09yellow
Regulation of actin cytoskeleton	KEGG PATHWAY	mmu04810	2/62	220/8979	0.451264179	0.662040705	83767/16400	Wasf1/Itga3	http://www.genome.jp/kegg-bin/show_pathway?mmu04810/mmu:83767%09yellow/mmu:16400%09yellow
PI3K-Akt signaling pathway	KEGG PATHWAY	mmu04151	3/62	359/8979	0.453671917	0.662040705	12842/13638/16400	Col1a1/Efna3/Itga3	http://www.genome.jp/kegg-bin/show_pathway?mmu04151/mmu:12842%09yellow/mmu:13638%09red/mmu:16400%09yellow
Chemical carcinogenesis - reactive oxygen species	KEGG PATHWAY	mmu05208	2/62	222/8979	0.455925736	0.662040705	407790/84682	Ndufa4l2/Cox4i2	http://www.genome.jp/kegg-bin/show_pathway?mmu05208/mmu:407790%09yellow/mmu:84682%09red
Colorectal cancer	KEGG PATHWAY	mmu05210	1/62	88/8979	0.458131196	0.662040705	16842	Lef1	http://www.genome.jp/kegg-bin/show_pathway?mmu05210/mmu:16842%09yellow
Viral myocarditis	KEGG PATHWAY	mmu05416	1/62	88/8979	0.458131196	0.662040705	630294	Gm7030	http://www.genome.jp/kegg-bin/show_pathway?mmu05416/mmu:630294%09red
Hypertrophic cardiomyopathy	KEGG PATHWAY	mmu05410	1/62	91/8979	0.4693895	0.662040705	16400	Itga3	http://www.genome.jp/kegg-bin/show_pathway?mmu05410/mmu:16400%09yellow
Viral carcinogenesis	KEGG PATHWAY	mmu05203	2/62	229/8979	0.472066451	0.662040705	630294/12771	Gm7030/Ccr3	http://www.genome.jp/kegg-bin/show_pathway?mmu05203/mmu:630294%09red/mmu:12771%09yellow
Steroid hormone biosynthesis	KEGG PATHWAY	mmu00140	1/62	92/8979	0.473090879	0.662040705	15485	Hsd17b1	http://www.genome.jp/kegg-bin/show_pathway?mmu00140/mmu:15485%09yellow
Fc gamma R-mediated phagocytosis	KEGG PATHWAY	mmu04666	1/62	92/8979	0.473090879	0.662040705	83767	Wasf1	http://www.genome.jp/kegg-bin/show_pathway?mmu04666/mmu:83767%09yellow
Taste transduction	KEGG PATHWAY	mmu04742	1/62	92/8979	0.473090879	0.662040705	12496	Entpd2	http://www.genome.jp/kegg-bin/show_pathway?mmu04742/mmu:12496%09yellow
Thermogenesis	KEGG PATHWAY	mmu04714	2/62	231/8979	0.476627047	0.662040705	407790/84682	Ndufa4l2/Cox4i2	http://www.genome.jp/kegg-bin/show_pathway?mmu04714/mmu:407790%09yellow/mmu:84682%09red
Complement and coagulation cascades	KEGG PATHWAY	mmu04610	1/62	93/8979	0.476766851	0.662040705	12268	C4b	http://www.genome.jp/kegg-bin/show_pathway?mmu04610/mmu:12268%09yellow
Small cell lung cancer	KEGG PATHWAY	mmu05222	1/62	93/8979	0.476766851	0.662040705	16400	Itga3	http://www.genome.jp/kegg-bin/show_pathway?mmu05222/mmu:16400%09yellow
Hematopoietic cell lineage	KEGG PATHWAY	mmu04640	1/62	94/8979	0.480417589	0.662040705	16400	Itga3	http://www.genome.jp/kegg-bin/show_pathway?mmu04640/mmu:16400%09yellow
Dilated cardiomyopathy	KEGG PATHWAY	mmu05414	1/62	94/8979	0.480417589	0.662040705	16400	Itga3	http://www.genome.jp/kegg-bin/show_pathway?mmu05414/mmu:16400%09yellow
Viral protein interaction with cytokine and cytokine receptor	KEGG PATHWAY	mmu04061	1/62	95/8979	0.484043262	0.662040705	12771	Ccr3	http://www.genome.jp/kegg-bin/show_pathway?mmu04061/mmu:12771%09yellow
Phosphatidylinositol signaling system	KEGG PATHWAY	mmu04070	1/62	96/8979	0.487644041	0.662040705	18799	Plcd1	http://www.genome.jp/kegg-bin/show_pathway?mmu04070/mmu:18799%09red
Retinol metabolism	KEGG PATHWAY	mmu00830	1/62	97/8979	0.491220093	0.662040705	11761	Aox1	http://www.genome.jp/kegg-bin/show_pathway?mmu00830/mmu:11761%09red
Circadian entrainment	KEGG PATHWAY	mmu04713	1/62	98/8979	0.494771585	0.662040705	14813	Grin2c	http://www.genome.jp/kegg-bin/show_pathway?mmu04713/mmu:14813%09yellow
Choline metabolism in cancer	KEGG PATHWAY	mmu05231	1/62	98/8979	0.494771585	0.662040705	83767	Wasf1	http://www.genome.jp/kegg-bin/show_pathway?mmu05231/mmu:83767%09yellow
Prostate cancer	KEGG PATHWAY	mmu05215	1/62	99/8979	0.498298684	0.662040705	16842	Lef1	http://www.genome.jp/kegg-bin/show_pathway?mmu05215/mmu:16842%09yellow
Bile secretion	KEGG PATHWAY	mmu04976	1/62	100/8979	0.501801553	0.662040705	67821	Atp1b4	http://www.genome.jp/kegg-bin/show_pathway?mmu04976/mmu:67821%09red
Aldosterone synthesis and secretion	KEGG PATHWAY	mmu04925	1/62	102/8979	0.508735259	0.665595297	67821	Atp1b4	http://www.genome.jp/kegg-bin/show_pathway?mmu04925/mmu:67821%09red
Th17 cell differentiation	KEGG PATHWAY	mmu04659	1/62	105/8979	0.518958159	0.670960365	50931	Il27ra	http://www.genome.jp/kegg-bin/show_pathway?mmu04659/mmu:50931%09yellow
Salmonella infection	KEGG PATHWAY	mmu05132	2/62	253/8979	0.52521968	0.670960365	545486/16842	Tubb1/Lef1	http://www.genome.jp/kegg-bin/show_pathway?mmu05132/mmu:545486%09yellow/mmu:16842%09yellow
Amoebiasis	KEGG PATHWAY	mmu05146	1/62	107/8979	0.525656846	0.670960365	12842	Col1a1	http://www.genome.jp/kegg-bin/show_pathway?mmu05146/mmu:12842%09yellow
Human cytomegalovirus infection	KEGG PATHWAY	mmu05163	2/62	256/8979	0.531614661	0.672629629	630294/12771	Gm7030/Ccr3	http://www.genome.jp/kegg-bin/show_pathway?mmu05163/mmu:630294%09red/mmu:12771%09yellow
Toxoplasmosis	KEGG PATHWAY	mmu05145	1/62	110/8979	0.535533144	0.672629629	15511	Hspa1b	http://www.genome.jp/kegg-bin/show_pathway?mmu05145/mmu:15511%09red
Cholinergic synapse	KEGG PATHWAY	mmu04725	1/62	112/8979	0.542004652	0.673996124	16535	Kcnq1	http://www.genome.jp/kegg-bin/show_pathway?mmu04725/mmu:16535%09yellow
Glutamatergic synapse	KEGG PATHWAY	mmu04724	1/62	113/8979	0.545207055	0.673996124	14813	Grin2c	http://www.genome.jp/kegg-bin/show_pathway?mmu04724/mmu:14813%09yellow
Growth hormone synthesis, secretion and action	KEGG PATHWAY	mmu04935	1/62	116/8979	0.554682662	0.680352953	20609	Sstr5	http://www.genome.jp/kegg-bin/show_pathway?mmu04935/mmu:20609%09red
Sphingolipid signaling pathway	KEGG PATHWAY	mmu04071	1/62	124/8979	0.579011622	0.694373514	74442	Sgms2	http://www.genome.jp/kegg-bin/show_pathway?mmu04071/mmu:74442%09red
Platelet activation	KEGG PATHWAY	mmu04611	1/62	124/8979	0.579011622	0.694373514	12842	Col1a1	http://www.genome.jp/kegg-bin/show_pathway?mmu04611/mmu:12842%09yellow
Cell cycle	KEGG PATHWAY	mmu04110	1/62	125/8979	0.581959254	0.694373514	55948	Sfn	http://www.genome.jp/kegg-bin/show_pathway?mmu04110/mmu:55948%09yellow
Osteoclast differentiation	KEGG PATHWAY	mmu04380	1/62	128/8979	0.590680852	0.694373514	14282	Fosb	http://www.genome.jp/kegg-bin/show_pathway?mmu04380/mmu:14282%09yellow
Staphylococcus aureus infection	KEGG PATHWAY	mmu05150	1/62	128/8979	0.590680852	0.694373514	12268	C4b	http://www.genome.jp/kegg-bin/show_pathway?mmu05150/mmu:12268%09yellow
Relaxin signaling pathway	KEGG PATHWAY	mmu04926	1/62	129/8979	0.593548074	0.694373514	12842	Col1a1	http://www.genome.jp/kegg-bin/show_pathway?mmu04926/mmu:12842%09yellow
MAPK signaling pathway	KEGG PATHWAY	mmu04010	2/62	294/8979	0.607579181	0.694373514	15511/13638	Hspa1b/Efna3	http://www.genome.jp/kegg-bin/show_pathway?mmu04010/mmu:15511%09red/mmu:13638%09red
Spliceosome	KEGG PATHWAY	mmu03040	1/62	134/8979	0.607590412	0.694373514	15511	Hspa1b	http://www.genome.jp/kegg-bin/show_pathway?mmu03040/mmu:15511%09red
Estrogen signaling pathway	KEGG PATHWAY	mmu04915	1/62	134/8979	0.607590412	0.694373514	15511	Hspa1b	http://www.genome.jp/kegg-bin/show_pathway?mmu04915/mmu:15511%09red
Lysosome	KEGG PATHWAY	mmu04142	1/62	135/8979	0.61034105	0.694373514	100862375	Entpd4b	http://www.genome.jp/kegg-bin/show_pathway?mmu04142/mmu:100862375%09red
Herpes simplex virus 1 infection	KEGG PATHWAY	mmu05168	3/62	459/8979	0.62099432	0.699560849	236193/630294/54678	Zfp709/Gm7030/Zfp108	http://www.genome.jp/kegg-bin/show_pathway?mmu05168/mmu:236193%09red/mmu:630294%09red/mmu:54678%09red
Signaling pathways regulating pluripotency of stem cells	KEGG PATHWAY	mmu04550	1/62	140/8979	0.623812222	0.699560849	22414	Wnt2b	http://www.genome.jp/kegg-bin/show_pathway?mmu04550/mmu:22414%09red
Measles	KEGG PATHWAY	mmu05162	1/62	146/8979	0.639373813	0.707508858	15511	Hspa1b	http://www.genome.jp/kegg-bin/show_pathway?mmu05162/mmu:15511%09red
Retrograde endocannabinoid signaling	KEGG PATHWAY	mmu04723	1/62	148/8979	0.644418896	0.707508858	407790	Ndufa4l2	http://www.genome.jp/kegg-bin/show_pathway?mmu04723/mmu:407790%09yellow
Systemic lupus erythematosus	KEGG PATHWAY	mmu05322	1/62	148/8979	0.644418896	0.707508858	12268	C4b	http://www.genome.jp/kegg-bin/show_pathway?mmu05322/mmu:12268%09yellow
Biosynthesis of cofactors	KEGG PATHWAY	mmu01240	1/62	152/8979	0.654301633	0.71337053	633979	Ak9	http://www.genome.jp/kegg-bin/show_pathway?mmu01240/mmu:633979%09yellow
mTOR signaling pathway	KEGG PATHWAY	mmu04150	1/62	157/8979	0.666275711	0.72141577	22414	Wnt2b	http://www.genome.jp/kegg-bin/show_pathway?mmu04150/mmu:22414%09red
Tight junction	KEGG PATHWAY	mmu04530	1/62	167/8979	0.689012701	0.740924616	93737	Pard6g	http://www.genome.jp/kegg-bin/show_pathway?mmu04530/mmu:93737%09yellow
Protein processing in endoplasmic reticulum	KEGG PATHWAY	mmu04141	1/62	172/8979	0.699802561	0.744599983	15511	Hspa1b	http://www.genome.jp/kegg-bin/show_pathway?mmu04141/mmu:15511%09red
cGMP-PKG signaling pathway	KEGG PATHWAY	mmu04022	1/62	173/8979	0.701915908	0.744599983	67821	Atp1b4	http://www.genome.jp/kegg-bin/show_pathway?mmu04022/mmu:67821%09red
Cellular senescence	KEGG PATHWAY	mmu04218	1/62	184/8979	0.724218139	0.763102335	630294	Gm7030	http://www.genome.jp/kegg-bin/show_pathway?mmu04218/mmu:630294%09red
Chemokine signaling pathway	KEGG PATHWAY	mmu04062	1/62	192/8979	0.739398563	0.773903829	12771	Ccr3	http://www.genome.jp/kegg-bin/show_pathway?mmu04062/mmu:12771%09yellow
Lipid and atherosclerosis	KEGG PATHWAY	mmu05417	1/62	216/8979	0.780175993	0.811176364	15511	Hspa1b	http://www.genome.jp/kegg-bin/show_pathway?mmu05417/mmu:15511%09red
Transcriptional misregulation in cancer	KEGG PATHWAY	mmu05202	1/62	224/8979	0.792319327	0.818382463	110794	Cebpe	http://www.genome.jp/kegg-bin/show_pathway?mmu05202/mmu:110794%09red
Epstein-Barr virus infection	KEGG PATHWAY	mmu05169	1/62	231/8979	0.802401632	0.81946056	630294	Gm7030	http://www.genome.jp/kegg-bin/show_pathway?mmu05169/mmu:630294%09red
Ras signaling pathway	KEGG PATHWAY	mmu04014	1/62	232/8979	0.803802078	0.81946056	13638	Efna3	http://www.genome.jp/kegg-bin/show_pathway?mmu04014/mmu:13638%09red
Human immunodeficiency virus 1 infection	KEGG PATHWAY	mmu05170	1/62	240/8979	0.814659622	0.825171359	630294	Gm7030	http://www.genome.jp/kegg-bin/show_pathway?mmu05170/mmu:630294%09red
Coronavirus disease - COVID-19	KEGG PATHWAY	mmu05171	1/62	247/8979	0.823673499	0.827403242	12268	C4b	http://www.genome.jp/kegg-bin/show_pathway?mmu05171/mmu:12268%09yellow
Human T-cell leukemia virus 1 infection	KEGG PATHWAY	mmu05166	1/62	250/8979	0.827403242	0.827403242	630294	Gm7030	http://www.genome.jp/kegg-bin/show_pathway?mmu05166/mmu:630294%09red
