# Supplementary material for: Anti-inflammatory role of low-intensity pulsed ultrasound in inhibiting lipopolysaccharide-induced M1 polarization of RAW264.7 cells via Wnt2b/AXIN/β-catenin
Source: PeerJ journal article supplement (doi:10.7717/peerj.18448), 2024-11-13
Supplement: supplemental_files.zip [file LPS--LIPUS-LPS.different.gene.xls]

gene	gene_type	Position	Strand	LPS-1	LPS-2	LPS-3	LIPUS-LPS-1	LIPUS-LPS-2	LIPUS-LPS-3	log2(Fold_change)	p-value	Description	Website
Rn7s2	scRNA	chr12:69361183-69361481	-	104.8815562	2473.248709	1054.19636	105.643445	66.31522689	57.99160545	-3.978976836	3.56E-10	7S RNA 2	http://www.ncbi.nlm.nih.gov/gene/?term=103949
Ak9	protein_coding	chr10:41303432-41433569	+	44.55356059	0	0.023785745	0	0	0	-6.885071766	2.01E-07	adenylate kinase 9	http://www.ncbi.nlm.nih.gov/gene/?term=633979
Rn7s1	scRNA	chr12:69159295-69159593	+	101.8412583	860.9686132	524.4947506	114.8086085	92.22998593	49.91147788	-2.530648504	2.27E-06	7S RNA 1	http://www.ncbi.nlm.nih.gov/gene/?term=103948
LOC115487216	lncRNA	chr9:35117200-35119544	-	0.945998021	0.943142356	1.007245665	8.153783189	11.49457623	8.270317563	3.108015369	7.26E-06	uncharacterized LOC115487216	http://www.ncbi.nlm.nih.gov/gene/?term=115487216
Zfp709	protein_coding	chr8:71882068-71892565	+	9.60227989	2.772663351	5.036912627	13.27262064	17.85362546	23.64601447	1.631271612	3.31E-05	zinc finger protein 709	http://www.ncbi.nlm.nih.gov/gene/?term=236193
Zfp976	protein_coding	chr7:42609514-42644267	-	1.896291095	0.921938735	3.017159555	13.21423095	4.33297813	15.4066284	2.433215838	3.91E-05	zinc finger protein 976	http://www.ncbi.nlm.nih.gov/gene/?term=208111
Pigz	protein_coding	chr16:31926965-31946048	+	18.09053607	12.21503399	20.12514239	5.091368304	8.319031889	2.104818379	-1.67652843	4.77E-05	phosphatidylinositol glycan anchor biosynthesis, class Z	http://www.ncbi.nlm.nih.gov/gene/?term=239827
LOC115487273	snoRNA	chr9:15314845-15314981	+	17.19863724	15.20854745	8.070823366	27.49471189	35.53343078	23.79906573	1.088103042	0.000157677	small nucleolar RNA SNORA8	http://www.ncbi.nlm.nih.gov/gene/?term=115487273
Gm23123	snoRNA	chr17:26223502-26223645	+	6.632302148	10.50823953	5.041689303	0.004530928	1.053328238	2.049358159	-2.703348725	0.000221351	small nucleolar RNA SNORA48	http://www.ncbi.nlm.nih.gov/gene/?term=115488841
Tyw3	protein_coding	chr3:154576520-154597113	-	2.810194735	4.742227724	6.036023825	15.25939694	7.4868705	19.51774783	1.61617438	0.000248633	tRNA-yW synthesizing protein 3 homolog (S. cerevisiae)	http://www.ncbi.nlm.nih.gov/gene/?term=209584
Clec9a	protein_coding	chr6:129408862-129424764	+	0	0	0	6.093947554	3.181163775	4.134055901	5.202501537	0.000301805	C-type lectin domain family 9, member a	http://www.ncbi.nlm.nih.gov/gene/?term=232414
Cideb	protein_coding	chr14:55754052-55758424	-	20.95700674	16.04317408	20.13261452	9.148202521	9.404465514	4.174901742	-1.315463045	0.000325312	cell death-inducing DNA fragmentation factor, alpha subunit-like effector B	http://www.ncbi.nlm.nih.gov/gene/?term=12684
Gm51701	lncRNA	chr9:123925148-123928706	+	1.921823511	0	1.007245674	5.105194089	11.43146429	4.166404018	2.682274232	0.000432789	predicted gene, 51701	http://www.ncbi.nlm.nih.gov/gene/?term=115487206
Gm20199	lncRNA	chr9:59477745-59481741	-	9.475581775	10.41978791	12.07717003	16.3414132	28.22712837	25.75745829	1.127924584	0.000462557	predicted gene, 20199	http://www.ncbi.nlm.nih.gov/gene/?term=100504377
Slc16a4	protein_coding	chr3:107291230-107312115	+	9.574313712	2.75327917	8.050506394	21.34363704	20.91371349	10.41396013	1.357320998	0.000502329	solute carrier family 16 (monocarboxylic acid transporters), member 4	http://www.ncbi.nlm.nih.gov/gene/?term=229699
Echdc2	protein_coding	chr4:108165436-108179308	+	0	0	0	7.098550224	2.144338898	3.1120066	5.089758521	0.000648405	enoyl Coenzyme A hydratase domain containing 2	http://www.ncbi.nlm.nih.gov/gene/?term=52430
H4c4	protein_coding	chr13:23581568-23581969	+	14.42420664	7.568638447	2.029343793	20.35233595	25.06162971	13.49681961	1.272743025	0.000653596	H4 clustered histone 4	http://www.ncbi.nlm.nih.gov/gene/?term=319156
Col1a1	protein_coding	chr11:94936224-94953042	+	10.31426259	23.88551177	16.11110227	9.138548914	3.220960936	7.213318763	-1.342397194	0.000751601	collagen, type I, alpha 1	http://www.ncbi.nlm.nih.gov/gene/?term=12842
Gm22581	snoRNA	chr3:96724265-96724400	-	16.23159012	9.386942671	14.09264264	7.102061845	3.181162374	3.116598575	-1.537648804	0.000834455	small nucleolar RNA SNORA5	http://www.ncbi.nlm.nih.gov/gene/?term=115489818
Gm46735	lncRNA	chr2:36191946-36193729	+	12.31166303	15.19134035	15.09930199	9.124743473	4.223358459	2.104810381	-1.437364723	0.000914501	predicted gene, 46735	http://www.ncbi.nlm.nih.gov/gene/?term=108168747
Aloxe3	protein_coding	chr11:69125417-69149115	+	0	0.921933655	5.022812614	6.128502458	13.52242542	6.225912527	2.082591165	0.000920224	arachidonate lipoxygenase 3	http://www.ncbi.nlm.nih.gov/gene/?term=23801
Gm33144	lncRNA	chr6:125542652-125546613	+	11.39922926	6.517145112	17.09693229	3.061035375	2.13786411	6.153262835	-1.587251836	0.00095087	predicted gene, 33144	http://www.ncbi.nlm.nih.gov/gene/?term=102635933
Cebpe	protein_coding	chr14:54710363-54712174	-	13.34813739	12.34023284	9.069426821	25.43370884	21.05246536	24.7458523	1.024679752	0.001030107	CCAAT/enhancer binding protein (C/EBP), epsilon	http://www.ncbi.nlm.nih.gov/gene/?term=110794
Gm15704	lncRNA	chr6:145741127-145748374	-	2.86296391	0.915519956	3.018333196	8.150986451	10.46218717	8.26539375	1.929109857	0.001073613	predicted gene 15704, transcript variant X2	http://www.ncbi.nlm.nih.gov/gene/?term=102641081
2610028H24Rik	protein_coding	chr10:76449049-76461218	+	1.824911466	9.591391591	5.035903765	1.016656724	1.045537996	0.00529617	-2.785255463	0.001136647	RIKEN cDNA 2610028H24 gene	http://www.ncbi.nlm.nih.gov/gene/?term=76964
Gm31940	lncRNA	chr3:87372949-87377603	-	3.80492506	2.822472654	4.02609771	0	0	0	-4.878509442	0.001156563	predicted gene, 31940, transcript variant X2	http://www.ncbi.nlm.nih.gov/gene/?term=102634332
Gm52286	lncRNA	chr17:25188054-25189470	-	0	0	0	5.079100356	3.166686587	3.107296007	4.968687331	0.00115692	predicted gene, 52286	http://www.ncbi.nlm.nih.gov/gene/?term=115488770
H3c6	protein_coding	chr13:23561475-23562385	-	16.24871375	7.464044547	14.09050513	23.44163227	40.61318219	17.66550612	1.105590988	0.00123798	H3 clustered histone 6	http://www.ncbi.nlm.nih.gov/gene/?term=319151
Bean1	protein_coding	chr8:104170379-104219098	+	0	0	0	5.079098976	1.103026891	5.139005549	4.96817797	0.001244874	brain expressed, associated with Nedd4, 1	http://www.ncbi.nlm.nih.gov/gene/?term=65115
H2ac22	protein_coding	chr13:21786774-21787248	-	0	0	0	4.07044932	6.237982653	1.066248169	4.969429495	0.001286804	H2A clustered histone 22	http://www.ncbi.nlm.nih.gov/gene/?term=319170
Gm32904	lncRNA	chrX:36020387-36027133	-	2.731067592	8.524378706	15.07959235	2.037471195	3.126100649	1.047444697	-2.016349639	0.001402592	predicted gene, 32904	http://www.ncbi.nlm.nih.gov/gene/?term=102635614
Rfx2	protein_coding	chr17:56775897-56831008	-	4.763431009	2.807399891	5.031641152	13.22037198	9.498671985	12.37141942	1.453382222	0.001483216	regulatory factor X, 2 (influences HLA class II expression)	http://www.ncbi.nlm.nih.gov/gene/?term=19725
Gm52481	protein_coding	chrY:90742729-90745083	+	2.846594974	0.903291328	5.026884953	12.19616399	12.53538192	5.223971183	1.738344028	0.001597887	predicted gene, 52481	http://www.ncbi.nlm.nih.gov/gene/?term=115489304
Grin2c	protein_coding	chr11:115249169-115267297	-	6.68069488	7.638753701	2.023506538	1.016656607	0.008188082	1.029294862	-2.784226316	0.001713552	glutamate receptor, ionotropic, NMDA2C (epsilon 3)	http://www.ncbi.nlm.nih.gov/gene/?term=14813
Mir1198	ncRNA	chrX:7807101-7807221	+	3.713646437	13.42700559	6.046521857	0.007534389	4.137102599	1.043295908	-2.089182815	0.001799538	microRNA 1198	http://www.ncbi.nlm.nih.gov/gene/?term=100316807
Gm36402	lncRNA	chr13:48491392-48505499	+	5.68966671	5.673214799	7.044954604	12.23651735	17.7738805	14.44985061	1.255190529	0.001857427	predicted gene, 36402, transcript variant X5	http://www.ncbi.nlm.nih.gov/gene/?term=102640299
Rnf122	protein_coding	chr8:31111827-31133318	+	5.674436215	6.629120207	8.050506106	0.006034542	4.126131556	0.010568655	-2.199683334	0.001969014	ring finger protein 122	http://www.ncbi.nlm.nih.gov/gene/?term=68867
Gm41089	lncRNA	chr14:5038401-5047660	+	4.72421946	3.73974846	9.050160937	0.00453084	0.012268293	3.062045465	-2.35866736	0.002000824	predicted gene, 41089, transcript variant X2	http://www.ncbi.nlm.nih.gov/gene/?term=105245667
Il27ra	protein_coding	chr8:84030286-84042600	-	6.680704617	8.614707415	1.017975225	0.00302415	1.045538248	1.02929523	-2.78228382	0.002004512	interleukin 27 receptor, alpha	http://www.ncbi.nlm.nih.gov/gene/?term=50931
A430078I02Rik	lncRNA	chr6:86470277-86480830	-	0	0	3.013181791	9.138556142	9.378075877	1.092785	2.606195978	0.002182902	RIKEN cDNA A430078I02 gene	http://www.ncbi.nlm.nih.gov/gene/?term=320486
Gm40233	lncRNA	chr4:117874521-117879364	+	2.838882459	3.803297952	3.021569074	0	0	0	-4.745528982	0.00227876	predicted gene, 40233	http://www.ncbi.nlm.nih.gov/gene/?term=105244667
Mapk15	protein_coding	chr15:75993732-75999153	+	13.22582864	19.01533994	18.11823768	6.120551657	4.271798496	12.30409758	-1.134721532	0.002451215	mitogen-activated protein kinase 15	http://www.ncbi.nlm.nih.gov/gene/?term=332110
Ankrd7	protein_coding	chr6:18855842-18879589	+	1.881480275	2.846907814	3.019454019	5.120281058	10.46219698	11.31294964	1.746228405	0.002498841	ankyrin repeat domain 7	http://www.ncbi.nlm.nih.gov/gene/?term=75196
LOC108168933	lncRNA	chr4:19645419-19656085	+	3.695239262	11.44580402	11.06714767	11.25595025	26.0684417	19.59282423	1.109632715	0.002509314	uncharacterized LOC108168933	http://www.ncbi.nlm.nih.gov/gene/?term=108168933
Hspa1b	protein_coding	chr17:34956429-34959238	-	133.6261645	64.69764937	118.7669273	237.3303516	504.7596555	85.83286253	1.38558228	0.002577315	heat shock protein 1B	http://www.ncbi.nlm.nih.gov/gene/?term=15511
Gm42273	lncRNA	chr4:41281625-41285141	-	2.838867081	0.897419215	6.03109049	0	0	0	-4.748693888	0.002658948	predicted gene, 42273	http://www.ncbi.nlm.nih.gov/gene/?term=105247115
Fut4	protein_coding	chr9:14748459-14752122	-	14.29816622	10.3720211	13.0870388	3.068869346	6.265199105	5.15540539	-1.361585964	0.002956529	fucosyltransferase 4	http://www.ncbi.nlm.nih.gov/gene/?term=14345
Alpk2	protein_coding	chr18:65265529-65393888	-	0	5.755044	4.024986045	0	0	0	-4.746679911	0.003117268	alpha-kinase 2	http://www.ncbi.nlm.nih.gov/gene/?term=225638
Gm31109	lncRNA	chr11:80509277-80511281	+	8.634082533	2.779335977	5.035904138	1.019506589	0.012268104	2.049357516	-2.276528837	0.003320682	predicted gene, 31109, transcript variant X3	http://www.ncbi.nlm.nih.gov/gene/?term=102633229
Gm11525	lncRNA	chr11:96918935-96927067	-	7.694735364	1.840592078	3.02450249	10.1869012	8.456695382	14.39174911	1.367375168	0.00346314	predicted gene 11525, transcript variant X3	http://www.ncbi.nlm.nih.gov/gene/?term=100502635
Gm30881	lncRNA	chr16:93807973-93833092	-	7.639270955	1.803790165	9.051384829	1.02213842	1.060528957	2.05523932	-2.059457335	0.003569833	predicted gene, 30881, transcript variant X2	http://www.ncbi.nlm.nih.gov/gene/?term=102632932
Chga	protein_coding	chr12:102554941-102565027	+	6.726198704	4.759810613	0.006438967	10.18120261	10.49469047	10.31849428	1.388143314	0.003816803	chromogranin A	http://www.ncbi.nlm.nih.gov/gene/?term=12652
Sgms2	protein_coding	chr3:131318985-131491443	-	0	0	0	7.091196096	3.159136967	0.026236521	4.834027079	0.003866778	sphingomyelin synthase 2	http://www.ncbi.nlm.nih.gov/gene/?term=74442
B130046B21Rik	lncRNA	chr15:98806315-98810380	+	2.817080619	3.777927221	6.034843699	9.179936646	13.59323231	11.35008894	1.410987345	0.004055123	RIKEN cDNA B130046B21 gene	http://www.ncbi.nlm.nih.gov/gene/?term=115488471
Gm39853	lncRNA	chr2:75613392-75615353	+	0.962332817	0	0.000543225	6.090631623	2.144340072	4.129005864	3.249179194	0.004068083	predicted gene, 39853, transcript variant X1	http://www.ncbi.nlm.nih.gov/gene/?term=105244203
4930412C18Rik	lncRNA	chr4:9770585-9823411	+	0	0	0	0.014982359	7.248817312	3.102452322	4.840422452	0.004129584	RIKEN cDNA 4930412C18 gene	http://www.ncbi.nlm.nih.gov/gene/?term=320152
Gm33392	lncRNA	chr6:53581351-53592876	-	0	0	0	1.037650805	1.103030593	9.192380403	4.968443562	0.004280289	predicted gene, 33392, transcript variant X2	http://www.ncbi.nlm.nih.gov/gene/?term=102636280
Gm36271	lncRNA	chr14:75802439-75804324	-	0	9.658465336	1.013827584	0	0	0	-4.86894872	0.004280289	predicted gene, 36271, transcript variant X2	http://www.ncbi.nlm.nih.gov/gene/?term=102640130
Gm22249	snRNA	chr5:38546458-38546593	+	10.47296991	8.500117024	10.06707541	0.014981786	5.206863231	5.133217554	-1.458078389	0.00435906	U4 spliceosomal RNA	http://www.ncbi.nlm.nih.gov/gene/?term=115490319
Vcan	protein_coding	chr13:89655309-89743027	-	2.862972006	2.855705939	1.010777008	12.17651239	5.308406139	6.216636598	1.754740622	0.004414102	versican	http://www.ncbi.nlm.nih.gov/gene/?term=13003
Efna3	protein_coding	chr3:89313899-89322939	-	13.35639594	7.492145961	13.08274619	32.50037741	29.26834741	10.48708915	1.083718675	0.004501503	ephrin A3	http://www.ncbi.nlm.nih.gov/gene/?term=13638
Hsd17b1	protein_coding	chr11:101077968-101081188	+	9.397270124	16.16443765	17.10616396	6.109334484	7.322977271	5.175472517	-1.180072967	0.004502522	hydroxysteroid (17-beta) dehydrogenase 1	http://www.ncbi.nlm.nih.gov/gene/?term=15485
Nxph4	protein_coding	chr10:127525473-127534559	-	0.938890568	1.908088326	1.008201081	4.097079012	15.52469798	2.126937664	2.384071887	0.004510056	neurexophilin 4	http://www.ncbi.nlm.nih.gov/gene/?term=104080
Gm51652	lncRNA	chr1:155866122-155900245	+	2.871715677	0	3.017159577	9.145040545	5.294430898	7.223739473	1.834977006	0.004620321	predicted gene, 51652, transcript variant X3	http://www.ncbi.nlm.nih.gov/gene/?term=115487128
Gm51938	lncRNA	chr11:22014953-22028377	+	5.713673247	4.725573093	5.034874595	9.187832764	9.513054775	18.4739642	1.243653991	0.0046559	predicted gene, 51938	http://www.ncbi.nlm.nih.gov/gene/?term=115487834
Gm31519	lncRNA	chr8:117019078-117021841	+	0	0	0	1.033551741	3.15135371	5.127213635	4.690024675	0.004716177	predicted gene, 31519	http://www.ncbi.nlm.nih.gov/gene/?term=102633772
Gm51671	lncRNA	chr1:168346170-168401494	+	3.813187344	0	6.031090531	9.166105885	6.371807301	13.35409345	1.541733926	0.004757732	predicted gene, 51671	http://www.ncbi.nlm.nih.gov/gene/?term=115487165
A830082N09Rik	lncRNA	chr10:33987216-33995055	-	4.79890199	2.838483661	1.012341895	0	0	0	-4.59794295	0.004803943	RIKEN cDNA A830082N09 gene	http://www.ncbi.nlm.nih.gov/gene/?term=414093
Gm52881	lncRNA	chr6:49018518-49020520	-	4.798890444	0.903298223	3.020530595	0	0	0	-4.599810282	0.004828735	predicted gene, 52881	http://www.ncbi.nlm.nih.gov/gene/?term=115490377
Ece2	protein_coding	chr16:20629851-20645915	+	20.01510243	18.99007068	14.10652716	5.11786078	13.52242895	7.243571502	-1.031962758	0.004908997	endothelin converting enzyme 2	http://www.ncbi.nlm.nih.gov/gene/?term=107522
Gm34865	lncRNA	chr3:90124644-90127116	+	2.862972006	2.855705939	1.010777008	15.20363437	3.251220439	6.221285779	1.814081665	0.004913216	predicted gene, 34865	http://www.ncbi.nlm.nih.gov/gene/?term=102638261
Wwtr1	protein_coding	chr3:57455644-57575910	-	2.810207543	6.691719651	4.02924428	0.00302415	1.045538248	1.02929523	-2.512087486	0.00498911	WW domain containing transcription regulator 1	http://www.ncbi.nlm.nih.gov/gene/?term=97064
Cabyr	protein_coding	chr18:12740825-12755146	+	1.874512428	5.765582172	1.012341832	0	0	0	-4.597001697	0.005318052	calcium-binding tyrosine-(Y)-phosphorylation regulated (fibrousheathin 2)	http://www.ncbi.nlm.nih.gov/gene/?term=71132
Gm51907	lncRNA	chr11:75116356-75131782	-	5.777396959	1.867869395	1.012341917	0	0	0	-4.597238065	0.005325912	predicted gene, 51907	http://www.ncbi.nlm.nih.gov/gene/?term=115487788
Ndufa4l2	protein_coding	chr10:127509274-127517154	+	8.624758749	2.77265575	6.040470919	1.022138222	0.016338823	3.068889585	-1.981908071	0.005545698	Ndufa4, mitochondrial complex associated like 2	http://www.ncbi.nlm.nih.gov/gene/?term=407790
Prss41	protein_coding	chr17:23836785-23844219	-	3.821758845	0	5.026884989	0	0	0	-4.6029401	0.005571475	protease, serine 41	http://www.ncbi.nlm.nih.gov/gene/?term=71003
Gm39690	lncRNA	chr1:164417492-164418573	-	0	0	0	3.055431689	0.036552871	6.140639938	4.688087018	0.006007835	predicted gene, 39690	http://www.ncbi.nlm.nih.gov/gene/?term=105243995
C4b	protein_coding	chr17:34728139-34743902	-	18.07480823	17.05361261	17.11674498	12.18326375	7.378324376	6.22588921	-1.006947798	0.006021009	complement component 4B (Chido blood group)	http://www.ncbi.nlm.nih.gov/gene/?term=12268
Folr2	protein_coding	chr7:101839988-101857190	-	0	0.951260362	1.006211416	2.057380178	9.330363312	3.12109179	2.684025669	0.006031664	folate receptor 2 (fetal)	http://www.ncbi.nlm.nih.gov/gene/?term=14276
Gm45989	lncRNA	chr7:66281726-66289099	+	2.854615204	1.87520497	3.019454046	13.18799219	5.315238211	6.221293356	1.63134331	0.006119597	predicted gene, 45989	http://www.ncbi.nlm.nih.gov/gene/?term=108167435
Mettl24	protein_coding	chr10:40682445-40812733	+	0	0.960342568	0.000543223	9.117326424	0.052555533	4.134049184	3.357393928	0.006125663	methyltransferase like 24	http://www.ncbi.nlm.nih.gov/gene/?term=327747
H4c2	protein_coding	chr13:23756937-23757386	+	0.91975328	0.915514254	5.024233803	10.15672851	7.35539867	5.194040352	1.690647279	0.006635072	H4 clustered histone 2	http://www.ncbi.nlm.nih.gov/gene/?term=326620
Adamts14	protein_coding	chr10:61197112-61273419	-	2.838872208	1.860748439	5.028133174	5.12267667	13.54087984	9.286929986	1.491236923	0.006869017	a disintegrin-like and metallopeptidase (reprolysin type) with thrombospondin type 1 motif, 14	http://www.ncbi.nlm.nih.gov/gene/?term=237360
Fut7	protein_coding	chr2:25422351-25426374	+	12.43240455	11.4276916	4.042479811	3.058278861	2.131215042	5.13321142	-1.408436901	0.007011507	fucosyltransferase 7	http://www.ncbi.nlm.nih.gov/gene/?term=14347
Gm33214	lncRNA	chr4:139006250-139019576	-	5.674467623	9.551766971	5.039826778	10.21354891	16.74113671	16.47717208	1.08050441	0.00713444	predicted gene, 33214, transcript variant X6	http://www.ncbi.nlm.nih.gov/gene/?term=102636025
Gm39497	lncRNA	chrX:17393298-17516990	-	0	0	1.005058941	2.050443871	3.166690344	6.153265159	3.127546216	0.007500944	predicted gene, 39497	http://www.ncbi.nlm.nih.gov/gene/?term=105243666
Gm13524	lncRNA	chr2:32845936-32850445	+	5.659684684	3.705039793	13.0684843	3.049413095	3.134885243	1.051430899	-1.576336725	0.007626182	predicted gene 13524	http://www.ncbi.nlm.nih.gov/gene/?term=105244117
Gm40260	lncRNA	chr5:4073414-4077204	-	2.880965246	0.928630681	1.009099789	8.130134425	6.306351432	5.180234461	1.939481247	0.007790719	predicted gene, 40260	http://www.ncbi.nlm.nih.gov/gene/?term=105244701
Mrap	protein_coding	chr16:90738207-90749785	+	7.630787305	7.611201951	4.034926804	1.024614171	2.09431494	2.060712613	-1.832061059	0.007836771	melanocortin 2 receptor accessory protein	http://www.ncbi.nlm.nih.gov/gene/?term=77037
Cd300ld5	protein_coding	chr11:115031447-115037780	-	3.804943173	5.744920054	1.013827683	0.001513845	1.036860298	0.002651195	-2.966874615	0.00784119	CD300 molecule like family member D5	http://www.ncbi.nlm.nih.gov/gene/?term=100043125
Entpd4b	protein_coding	chr14:69555401-69584940	+	3.774118007	4.733796764	6.037174181	9.17992663	7.435048501	17.44164715	1.209728491	0.007873237	ectonucleoside triphosphate diphosphohydrolase 4B	http://www.ncbi.nlm.nih.gov/gene/?term=100862375
Gm9732	lncRNA	chr14:43275036-43306011	+	5.757753777	0.89168999	4.026097784	1.013475582	0.004098724	0.002651102	-2.969654349	0.007905674	predicted gene 9732	http://www.ncbi.nlm.nih.gov/gene/?term=108168154
Gm41236	lncRNA	chr14:103059954-103062486	-	7.639347632	8.595295636	2.025024302	17.27103376	14.66711316	8.324838953	1.116511862	0.008022515	predicted gene, 41236, transcript variant X1	http://www.ncbi.nlm.nih.gov/gene/?term=105245847
C1ql3	protein_coding	chr2:13001887-13010864	-	4.709700895	8.585844952	6.042558697	1.024614641	4.137101781	0.013195376	-1.832376224	0.008035878	C1q-like 3	http://www.ncbi.nlm.nih.gov/gene/?term=227580
Gm52894	lncRNA	chr6:17820078-17841038	-	2.880965246	0.928630681	1.009099789	6.112212619	3.220966364	10.25776733	1.939336892	0.00835323	predicted gene, 52894, transcript variant X2	http://www.ncbi.nlm.nih.gov/gene/?term=115490398
Gm40422	lncRNA	chr12:51384171-51411226	-	1.931836137	0	0.001085229	4.076267092	3.181166577	6.165098128	2.578742789	0.00853707	predicted gene, 40422, transcript variant X2	http://www.ncbi.nlm.nih.gov/gene/?term=105244894
2810047C21Rik1	lncRNA	chr7:8078320-8093054	-	3.774125375	5.707285065	5.033822352	1.019506748	1.053327892	1.034307155	-2.10027858	0.008644071	RIKEN cDNA 2810047C21 gene 1, transcript variant X4	http://www.ncbi.nlm.nih.gov/gene/?term=105242405
Plcd1	protein_coding	chr9:119071527-119093502	-	0.945999525	1.917682485	0.001626007	5.09136494	4.223365218	6.176303941	2.275295862	0.008651395	phospholipase C, delta 1	http://www.ncbi.nlm.nih.gov/gene/?term=18799
Robo3	protein_coding	chr9:37416045-37433436	-	0	0	0	2.042939951	3.143282799	3.09224916	4.526841828	0.008738306	roundabout guidance receptor 3	http://www.ncbi.nlm.nih.gov/gene/?term=19649
C2cd4d	protein_coding	chr3:94362444-94364567	+	4.763452858	5.725579939	2.020311908	2.024408756	0.008187955	0.005295985	-2.407715234	0.008748113	C2 calcium-dependent domain containing 4D	http://www.ncbi.nlm.nih.gov/gene/?term=271944
Gm5176	transcribed_pseudogene	chr10:111500788-111501345	+	0	2.896262516	0.001626002	5.09136494	4.223365218	6.176303941	2.275338888	0.00876433	predicted gene 5176	http://www.ncbi.nlm.nih.gov/gene/?term=382421
Gm16287	lncRNA	chr4:139175407-139180655	-	0	0	0	4.060991472	2.117305672	2.075495265	4.526319109	0.008845545	predicted gene 16287	http://www.ncbi.nlm.nih.gov/gene/?term=100038595
Fbxl13	protein_coding	chr5:21483847-21645698	-	1.904251495	0	3.015921784	4.09216023	4.251775015	11.27165203	1.938608978	0.008876931	F-box and leucine-rich repeat protein 13	http://www.ncbi.nlm.nih.gov/gene/?term=320118
Gm34931	lncRNA	chr5:114696645-114707819	-	0	0	2.009129793	7.102062714	4.208229223	2.096932308	2.577466289	0.008886496	predicted gene, 34931, transcript variant X2	http://www.ncbi.nlm.nih.gov/gene/?term=102638343
Msl3l2	protein_coding	chr10:56083835-56116880	+	2.803472024	6.682153671	5.033822303	0.004531016	2.076674964	1.034307658	-2.100050544	0.008887576	MSL3 like 2	http://www.ncbi.nlm.nih.gov/gene/?term=73390
Gm35572	lncRNA	chr8:71752030-71756195	-	0	0	0	7.087322847	2.124368694	0.023639523	4.685856674	0.009070198	predicted gene, 35572, transcript variant X2	http://www.ncbi.nlm.nih.gov/gene/?term=102639212
Gm13840	lncRNA	chr5:115510939-115515995	+	7.490992692	16.20887455	14.09050399	5.094243016	3.201644479	8.211462288	-1.174021995	0.0090867	predicted gene 13840	http://www.ncbi.nlm.nih.gov/gene/?term=102639837
Gm46597	lncRNA	chr17:83771639-83777988	-	3.830680204	2.846916697	1.01157097	0	0	0	-4.435706155	0.009169097	predicted gene, 46597	http://www.ncbi.nlm.nih.gov/gene/?term=108168342
Gm15738	lncRNA	chr16:13392385-13422493	-	0	2.874648597	2.012818945	2.066014473	10.39076889	6.192178681	1.863941159	0.009207672	predicted gene 15738, transcript variant X4	http://www.ncbi.nlm.nih.gov/gene/?term=102635268
Gm51543	lncRNA	chr8:94781101-94785972	-	0.913865006	2.846903372	4.022642518	0	0	0	-4.438422997	0.00922737	predicted gene, 51543	http://www.ncbi.nlm.nih.gov/gene/?term=115486890
Gm30470	lncRNA	chr11:79224685-79248435	+	0	0	0	2.042940767	5.187852288	1.055286442	4.527592013	0.009457229	predicted gene, 30470, transcript variant X2	http://www.ncbi.nlm.nih.gov/gene/?term=102632381
Matn4	protein_coding	chr2:164389393-164405160	-	1.824885444	5.689853388	9.048911254	1.022138222	0.016338823	3.068889585	-1.90306378	0.009561698	matrilin 4	http://www.ncbi.nlm.nih.gov/gene/?term=17183
Tns4	protein_coding	chr11:99065678-99089306	-	1.842520273	10.60221222	1.015949065	0.001513815	0.004098788	1.023705549	-3.295374613	0.009568849	tensin 4	http://www.ncbi.nlm.nih.gov/gene/?term=217169
Gm805	lncRNA	chr12:86169341-86195102	+	4.808589025	1.875212691	1.01157099	0	0	0	-4.435334633	0.009659689	predicted gene 805	http://www.ncbi.nlm.nih.gov/gene/?term=328136
Gm32276	lncRNA	chr5:105651306-105662431	+	1.881472585	0.9093125	5.025587798	0	0	0	-4.440208764	0.009791029	predicted gene, 32276, transcript variant X2	http://www.ncbi.nlm.nih.gov/gene/?term=102634773
Colec11	protein_coding	chr12:28594172-28623458	-	1.881472585	0.9093125	5.025587798	0	0	0	-4.440211296	0.009792966	collectin sub-family member 11	http://www.ncbi.nlm.nih.gov/gene/?term=71693
9530052C20Rik	lncRNA	chr3:142882495-142894646	+	4.808578315	0	3.019454101	0	0	0	-4.438050924	0.010687516	RIKEN cDNA 9530052C20 gene	http://www.ncbi.nlm.nih.gov/gene/?term=320229
Gm46901	lncRNA	chr5:9158517-9160910	-	12.51752216	3.725587403	3.030620726	17.27417778	8.511361401	15.45069196	1.079561925	0.011031206	predicted gene, 46901	http://www.ncbi.nlm.nih.gov/gene/?term=108169023
Gjc2	protein_coding	chr11:59175564-59183213	-	5.697496875	4.709623332	7.043840466	11.21041476	6.430077505	20.50874009	1.115532949	0.011257673	gap junction protein, gamma 2	http://www.ncbi.nlm.nih.gov/gene/?term=118454
Lsr	protein_coding	chr7:30957770-30973469	-	8.488678509	14.2964575	11.07581406	4.079064529	5.241354904	5.155402852	-1.207003791	0.011747029	lipolysis stimulated lipoprotein receptor	http://www.ncbi.nlm.nih.gov/gene/?term=54135
Gm41024	lncRNA	chr13:94978597-94982413	+	5.713664384	3.754534002	6.038297397	8.1698068	14.61709375	11.3500946	1.119572336	0.01184637	predicted gene, 41024	http://www.ncbi.nlm.nih.gov/gene/?term=105245592
Sfn	protein_coding	chr4:133600556-133602168	-	0.833040589	9.523858986	13.0697705	0.009030744	4.147397549	2.065875029	-1.850728027	0.01231778	stratifin	http://www.ncbi.nlm.nih.gov/gene/?term=55948
2900060B14Rik	lncRNA	chr1:118458669-118459265	-	3.830675287	1.875208831	2.015880271	4.099470483	10.42771409	8.244962127	1.509236538	0.013054868	RIKEN cDNA 2900060B14 gene	http://www.ncbi.nlm.nih.gov/gene/?term=68204
Eaf2	protein_coding	chr16:36792884-36875068	-	10.57060308	4.7019323	3.029793438	9.195505287	21.83119241	9.343738248	1.119346283	0.013202691	ELL associated factor 2	http://www.ncbi.nlm.nih.gov/gene/?term=106389
Gm22513	snRNA	chr12:54696782-54696945	+	0	0.960342568	0.000543223	5.075803895	3.159139315	2.084433092	2.99489033	0.01330015	U1 spliceosomal RNA	http://www.ncbi.nlm.nih.gov/gene/?term=115488051
Icam4	protein_coding	chr9:21029432-21030596	+	1.819232274	8.604836523	7.043840216	12.21712435	7.454969693	17.45928141	1.076734229	0.013417045	intercellular adhesion molecule 4, Landsteiner-Wiener blood group	http://www.ncbi.nlm.nih.gov/gene/?term=78369
Slc35g2	protein_coding	chr9:100549125-100571085	-	0.861431322	10.55816048	6.040470447	15.24729803	6.430063925	16.44996273	1.115434038	0.01344183	solute carrier family 35, member G2	http://www.ncbi.nlm.nih.gov/gene/?term=245020
Morn5	protein_coding	chr2:36049473-36079709	+	2.838872208	1.860748439	5.028133174	1.013475582	0.004098724	0.002651102	-2.837669498	0.013477769	MORN repeat containing 5	http://www.ncbi.nlm.nih.gov/gene/?term=75495
Gm10037	protein_coding	chr13:67830938-67844879	+	5.787798178	1.875216551	0.004311835	0	0	0	-4.430146589	0.0136366	predicted gene 10037	http://www.ncbi.nlm.nih.gov/gene/?term=102637366
Gm51460	protein_coding	chr7:141228206-141229616	-	5.713664384	3.754534002	6.038297397	3.039197029	0.016338321	1.038936589	-1.816072306	0.0136507	predicted gene, 51460	http://www.ncbi.nlm.nih.gov/gene/?term=115486479
Gm28710	protein_coding	chr5:16791791-16882439	+	2.790412592	6.663706433	7.04270319	14.22921951	11.55158958	9.320990502	1.076142647	0.013759069	predicted gene 28710	http://www.ncbi.nlm.nih.gov/gene/?term=102640594
Gm42324	lncRNA	chr4:133594939-133596007	-	4.789570833	0.897426687	4.02498622	0.001513815	0.004098788	1.023705549	-2.837044502	0.013835319	predicted gene, 42324	http://www.ncbi.nlm.nih.gov/gene/?term=105247181
LOC115489601	snoRNA	chr2:130277697-130277766	+	0	0	1.005058941	1.035624676	3.159144013	6.147066174	2.994717392	0.014148993	small nucleolar RNA SNORD56	http://www.ncbi.nlm.nih.gov/gene/?term=115489601
Gm30927	lncRNA	chr11:53980031-53986217	+	4.771882841	2.814837021	4.027175569	0.00302415	1.045538248	1.02929523	-2.296485166	0.014563055	predicted gene, 30927	http://www.ncbi.nlm.nih.gov/gene/?term=102632992
Wasf1	protein_coding	chr10:40883480-40938569	+	6.707262411	3.769962525	3.025430433	1.019506748	1.053327892	1.034307155	-2.002726378	0.014615142	WAS protein family, member 1	http://www.ncbi.nlm.nih.gov/gene/?term=83767
Gm4221	lncRNA	chr18:54990295-55078400	+	4.755208007	2.800145059	6.036023926	1.019506908	2.076674523	0.007935225	-2.003779893	0.014619439	predicted gene 4221	http://www.ncbi.nlm.nih.gov/gene/?term=100043089
G370120E05Rik	lncRNA	chr1:180829523-180834121	+	1.888721382	0.915517105	4.021397526	6.11504637	8.363729519	6.202221336	1.556259556	0.014657488	RIKEN cDNA G370120E05 gene	http://www.ncbi.nlm.nih.gov/gene/?term=666457
Gm38832	lncRNA	chr6:72161912-72167826	+	3.796901586	2.814831215	5.030506712	0.003024209	2.066671278	0.005296355	-2.296783372	0.014720484	predicted gene, 38832	http://www.ncbi.nlm.nih.gov/gene/?term=105242682
Fst	protein_coding	chr13:114452262-114458989	-	1.896294247	1.89080043	2.013888035	2.068089479	12.4428009	5.18025295	1.695784973	0.014820117	follistatin	http://www.ncbi.nlm.nih.gov/gene/?term=14313
H4f16	protein_coding	chr6:136803993-136804431	-	0.953709362	0.95126147	0.001085226	6.090633962	5.224598781	1.069744124	2.466700674	0.015299229	H4 histone 16	http://www.ncbi.nlm.nih.gov/gene/?term=320332
A930005G22Rik	lncRNA	chr5:115420594-115429504	-	5.730584308	1.83416339	6.036023976	0.00453084	0.012268293	3.062045465	-2.00416817	0.015346203	RIKEN cDNA A930005G22 gene	http://www.ncbi.nlm.nih.gov/gene/?term=102639568
Dnase1	protein_coding	chr16:4036958-4040024	+	5.674404798	3.718589562	11.05996262	3.049412668	2.109978502	2.070785402	-1.446295053	0.015497374	deoxyribonuclease I	http://www.ncbi.nlm.nih.gov/gene/?term=13419
Snord100	snoRNA	chr10:23785754-23785821	-	1.931836137	0	0.001085229	5.082292843	1.108471298	6.159263876	2.466105403	0.015506915	small nucleolar RNA, C/D box 100	http://www.ncbi.nlm.nih.gov/gene/?term=100529075
Pldi	lncRNA	chr10:60928226-60938132	-	0	0.960342568	0.000543223	3.061038842	8.279198794	0.028831613	3.13311361	0.015572398	polymorphic derived intron containing	http://www.ncbi.nlm.nih.gov/gene/?term=73616
Mc1r	protein_coding	chr8:123407082-123410744	+	5.730576144	0.875101045	7.039134771	1.019506748	1.053327892	1.034307155	-2.004823088	0.015671501	melanocortin 1 receptor	http://www.ncbi.nlm.nih.gov/gene/?term=17199
Gm13262	lncRNA	chr2:9906149-9915582	+	0	3.864246094	0.002165567	6.109328451	1.139395703	11.26530071	2.16025252	0.015694249	predicted gene 13262	http://www.ncbi.nlm.nih.gov/gene/?term=100126244
Gm1653	lncRNA	chr3:149274737-149279980	+	0.861413741	7.629310767	9.050160663	2.034536565	0.020399959	3.075233307	-1.686673323	0.015735345	predicted gene 1653	http://www.ncbi.nlm.nih.gov/gene/?term=381482
Gm30601	lncRNA	chr5:53995251-53996613	+	8.634125424	6.663765125	1.017975294	3.039197029	0.016338321	1.038936589	-1.898459744	0.016073151	predicted gene, 30601	http://www.ncbi.nlm.nih.gov/gene/?term=102632559
Mccc1os	lncRNA	chr3:35999913-36008828	+	4.724228392	4.709614363	8.047061198	16.24962356	10.53303829	9.325621394	1.036486867	0.016101342	methylcrotonoyl-Coenzyme A carboxylase 1 (alpha), opposite strand	http://www.ncbi.nlm.nih.gov/gene/?term=654424
Gm46246	lncRNA	chr1:153377857-153397005	-	2.810201139	5.716300887	5.03274532	9.168950449	12.53539311	8.279960653	1.123052194	0.016434922	predicted gene, 46246	http://www.ncbi.nlm.nih.gov/gene/?term=108167838
Cercam	protein_coding	chr2:29845094-29882840	+	0.891780936	6.711634561	4.027175411	7.146559415	6.371813032	15.3829438	1.288753055	0.016541434	cerebral endothelial cell adhesion molecule	http://www.ncbi.nlm.nih.gov/gene/?term=99151
Aox1	protein_coding	chr1:58029809-58106410	+	1.842491912	5.716292688	6.036023775	13.20474505	9.461258827	7.262222999	1.122406661	0.016876211	aldehyde oxidase 1	http://www.ncbi.nlm.nih.gov/gene/?term=11761
Smim6	protein_coding	chr11:115912017-115913917	+	8.606710544	4.694320159	6.042558949	1.026971922	3.126101481	2.065873977	-1.585917778	0.016920601	small integral membrane protein 6	http://www.ncbi.nlm.nih.gov/gene/?term=68528
Carns1	protein_coding	chr19:4164324-4175479	-	3.739360717	9.561362464	6.042558635	1.026971653	2.102338833	3.081194889	-1.585902963	0.017310856	carnosine synthase 1	http://www.ncbi.nlm.nih.gov/gene/?term=107239
Hephl1	protein_coding	chr9:15051841-15112170	-	0.953708259	0	1.006211423	1.03963848	3.174025883	8.186510746	2.466380581	0.017358451	hephaestin-like 1	http://www.ncbi.nlm.nih.gov/gene/?term=244698
Baiap2l2	protein_coding	chr15:79258195-79285556	-	7.704854833	2.814854438	1.014547508	1.016656607	0.008188082	1.029294862	-2.294085775	0.017418804	BAI1-associated protein 2-like 2	http://www.ncbi.nlm.nih.gov/gene/?term=207495
Gm42023	lncRNA	chr5:123037342-123041582	+	1.888728395	2.855701874	2.014905317	0	0	0	-4.253720569	0.017456824	predicted gene, 42023, transcript variant X1	http://www.ncbi.nlm.nih.gov/gene/?term=105246785
Gcnt2	protein_coding	chr13:40859768-40960892	+	2.862967958	1.882835219	2.014905339	0	0	0	-4.253760359	0.017456903	glucosaminyl (N-acetyl) transferase 2, I-branching enzyme	http://www.ncbi.nlm.nih.gov/gene/?term=14538
Olfr1417	protein_coding	chr19:11828077-11829024	-	0	0	0	3.049412242	1.079968115	3.08684601	4.342478626	0.01749085	olfactory receptor 1417	http://www.ncbi.nlm.nih.gov/gene/?term=258938
4732491K20Rik	lncRNA	chr17:12318853-12327250	+	2.725629111	17.29344738	7.054163812	5.072389955	1.091791601	3.097434672	-1.505332505	0.017725203	RIKEN cDNA 4732491K20 gene	http://www.ncbi.nlm.nih.gov/gene/?term=224523
Gm41055	lncRNA	chr13:108015672-108044472	-	1.88147643	1.875201108	4.022642548	7.130190214	13.49363393	2.130440894	1.508719046	0.017732576	predicted gene, 41055, transcript variant X1	http://www.ncbi.nlm.nih.gov/gene/?term=105245626
LOC118027456	lncRNA	chr6:134233143-134243719	-	2.862972006	2.855705939	1.010777008	0	0	0	-4.25273574	0.017761077	uncharacterized LOC118027456	http://www.ncbi.nlm.nih.gov/gene/?term=118027456
Gm51710	lncRNA	chr9:63731608-63738382	+	0	0	0	2.040262646	1.079968771	4.101196828	4.342640439	0.017804309	predicted gene, 51710, transcript variant X1	http://www.ncbi.nlm.nih.gov/gene/?term=115487224
Gm46528	lncRNA	chr15:84890574-84896694	-	2.86296391	0.915519956	3.018333196	0	0	0	-4.254746703	0.017811407	predicted gene, 46528	http://www.ncbi.nlm.nih.gov/gene/?term=108168253
Sh3gl3	protein_coding	chr7:82173808-82307420	+	0	0	0	2.04026376	4.157148107	1.051431854	4.343522663	0.017839123	SH3-domain GRB2-like 3	http://www.ncbi.nlm.nih.gov/gene/?term=20408
Raver2	protein_coding	chr4:101069038-101152370	+	0	0	0	1.029236769	4.157149131	2.070787744	4.34375756	0.017843769	ribonucleoprotein, PTB-binding 2	http://www.ncbi.nlm.nih.gov/gene/?term=242570
Mir194-1	ncRNA	chr1:185313319-185313385	+	2.810220347	8.645531848	2.02113352	3.035300184	0.012267726	0.007934672	-2.001559781	0.018225466	microRNA 194-1	http://www.ncbi.nlm.nih.gov/gene/?term=387189
Zic5	protein_coding	chr14:122459160-122465658	-	0.91975612	1.882828176	4.021397498	0	0	0	-4.255982093	0.018260359	zinc finger protein of the cerebellum 5	http://www.ncbi.nlm.nih.gov/gene/?term=65100
Tubb1	protein_coding	chr2:174450595-174458380	+	0.91975612	1.882828176	4.021397498	0	0	0	-4.25598385	0.018262962	tubulin, beta 1 class VI	http://www.ncbi.nlm.nih.gov/gene/?term=545486
Gm6410	lncRNA	chr8:4674840-4688740	+	0	0	2.009129793	1.03963848	3.174025883	8.186510746	2.465057648	0.018323145	predicted gene 6410	http://www.ncbi.nlm.nih.gov/gene/?term=623223
Bcas3os1	lncRNA	chr11:85702200-85719744	-	0	0	0	3.049411815	0.02849461	4.101195335	4.341746335	0.018988245	breast carcinoma amplified sequence 3, opposite strand 1	http://www.ncbi.nlm.nih.gov/gene/?term=71489
Gm46590	lncRNA	chr17:64110773-64133442	-	0	0.960342568	0.000543223	3.058277777	0.040568316	7.160243306	2.994077276	0.019076706	predicted gene, 46590	http://www.ncbi.nlm.nih.gov/gene/?term=108168334
Sstr5	protein_coding	chr17:25489875-25497288	-	0	2.874648597	2.012818945	5.097062787	6.290416584	6.186993175	1.782138738	0.019137255	somatostatin receptor 5	http://www.ncbi.nlm.nih.gov/gene/?term=20609
Gm33845	lncRNA	chr3:89290540-89302980	-	4.724255183	7.629353381	5.036912351	3.042807896	2.094313669	0.013194461	-1.683686082	0.019332832	predicted gene, 33845, transcript variant X1	http://www.ncbi.nlm.nih.gov/gene/?term=102636898
Gm40802	lncRNA	chr10:127634677-127640420	+	0	0	0	1.029235862	1.079969427	5.11447265	4.342831122	0.019410029	predicted gene, 40802	http://www.ncbi.nlm.nih.gov/gene/?term=105245327
Gdpd2	protein_coding	chrX:100729836-100738901	+	0	0	0	1.029235862	1.079969427	5.11447265	4.34283107	0.019412316	glycerophosphodiester phosphodiesterase domain containing 2	http://www.ncbi.nlm.nih.gov/gene/?term=71584
LOC115489586	snoRNA	chr2:26912530-26912600	+	1.88147643	1.875201108	4.022642548	9.145045662	9.395827193	3.150113619	1.442154317	0.019631792	small nucleolar RNA SNORD36	http://www.ncbi.nlm.nih.gov/gene/?term=115489586
Gm39302	lncRNA	chr9:21318070-21321114	-	8.624792038	5.681496409	3.028952616	2.034536859	1.067306745	2.060711688	-1.683032995	0.019647613	predicted gene, 39302	http://www.ncbi.nlm.nih.gov/gene/?term=105243355
Gata2	protein_coding	chr6:88193891-88207032	+	12.40649599	12.37501653	6.053797612	4.076267092	3.181166577	6.165098128	-1.182525755	0.019835169	GATA binding protein 2	http://www.ncbi.nlm.nih.gov/gene/?term=14461
Ntn5	protein_coding	chr7:45684022-45694556	+	0.902582228	7.711510018	1.013093146	8.1481545	13.52241836	4.187212889	1.384616008	0.02005054	netrin 5	http://www.ncbi.nlm.nih.gov/gene/?term=243967
Gm23608	snoRNA	chr2:10075653-10075780	-	3.82176946	1.867861019	3.020530566	4.101835546	14.52466148	5.198518853	1.410682955	0.020199625	small nucleolar RNA SNORA17	http://www.ncbi.nlm.nih.gov/gene/?term=115486143
Lrrc8e	protein_coding	chr8:4224268-4237470	+	18.2194201	9.416784902	8.066428773	4.08446189	2.1689036	10.23902967	-1.097118853	0.020766699	leucine rich repeat containing 8 family, member E	http://www.ncbi.nlm.nih.gov/gene/?term=72267
Gm51857	lncRNA	chr11:33982823-33992776	+	0	0	0	5.065142053	0.028493741	2.07078306	4.340298702	0.020798275	predicted gene, 51857	http://www.ncbi.nlm.nih.gov/gene/?term=115487718
Nlrp9b	protein_coding	chr7:19991393-20062942	+	0	0	0	2.040262275	0.028495045	5.114471028	4.341708252	0.020877904	NLR family, pyrin domain containing 9B	http://www.ncbi.nlm.nih.gov/gene/?term=243874
Gm23472	snRNA	chr1:72236946-72237136	+	0	0	0	2.040262275	0.028495045	5.114471028	4.341706841	0.020885659	U2 spliceosomal RNA	http://www.ncbi.nlm.nih.gov/gene/?term=115487687
Gm41564	lncRNA	chr17:31834787-31844616	+	0	0	0	2.040264132	5.177750255	0.018431078	4.34480092	0.021022169	predicted gene, 41564	http://www.ncbi.nlm.nih.gov/gene/?term=105246256
H2ac20	protein_coding	chr3:96220413-96220880	-	7.574935462	6.581558932	12.07036851	14.28036177	31.15522637	8.377124615	1.028952419	0.021227385	H2A clustered histone 20	http://www.ncbi.nlm.nih.gov/gene/?term=319176
Ovol1	protein_coding	chr19:5549137-5560575	-	2.862972006	2.855705939	1.010777008	8.130134425	6.306351432	5.180234461	1.484177369	0.021954992	ovo like zinc finger 1	http://www.ncbi.nlm.nih.gov/gene/?term=18426
Pou4f1	protein_coding	chr14:104461675-104468118	-	0	4.809086116	2.014905274	6.112216779	7.331310621	6.197240694	1.484153129	0.022255393	POU domain, class 4, transcription factor 1	http://www.ncbi.nlm.nih.gov/gene/?term=18996
Sugct	protein_coding	chr13:16857472-17694795	-	2.796877837	6.672822426	6.038297232	8.164593633	10.50255897	13.37104267	1.030179721	0.022535159	succinyl-CoA glutarate-CoA transferase	http://www.ncbi.nlm.nih.gov/gene/?term=192136
Wnt2b	protein_coding	chr3:104944805-104961709	-	3.781533621	5.716309085	4.029244324	9.16610892	8.42743545	11.32390743	1.073029694	0.022728778	wingless-type MMTV integration site family, member 2B	http://www.ncbi.nlm.nih.gov/gene/?term=22414
Rsf1os2	lncRNA	chr7:97650010-97696621	-	0	2.885033228	1.008201069	2.059593069	5.249423644	8.205467541	1.902378837	0.022923846	remodeling and spacing factor 1, opposite strand 2	http://www.ncbi.nlm.nih.gov/gene/?term=102641859
Klhdc9	protein_coding	chr1:171358449-171360798	-	14.38572144	7.536845746	6.051156149	3.063712567	1.108473277	8.186505275	-1.154422158	0.023078861	kelch domain containing 9	http://www.ncbi.nlm.nih.gov/gene/?term=68874
Pls1	protein_coding	chr9:95752642-95845306	-	2.80348543	8.634986413	3.026337496	2.031424974	2.085809034	0.01056792	-1.723557735	0.023341458	plastin 1 (I-isoform)	http://www.ncbi.nlm.nih.gov/gene/?term=102502
Gm26202	snoRNA	chr18:75001880-75001944	+	1.91271175	0	2.011684834	3.071360697	9.340351877	3.12547378	1.902309069	0.023513741	small nucleolar RNA SNORD58	http://www.ncbi.nlm.nih.gov/gene/?term=115488998
Palld	protein_coding	chr8:61511431-61902707	-	2.89082356	0	1.008201104	3.071356428	3.194964994	9.219198213	1.901913	0.023650855	palladin, cytoskeletal associated protein	http://www.ncbi.nlm.nih.gov/gene/?term=72333
Gm46052	lncRNA	chr8:110936187-110939307	-	0	0	1.005058941	4.06425847	3.151350428	2.080037034	2.848031418	0.023672344	predicted gene, 46052	http://www.ncbi.nlm.nih.gov/gene/?term=108167554
Atp7b	protein_coding	chr8:21992783-22060074	-	10.55143145	3.718635473	6.043574757	1.029237072	5.177751368	1.051432808	-1.443942473	0.02367553	ATPase, Cu++ transporting, beta polypeptide	http://www.ncbi.nlm.nih.gov/gene/?term=11979
Gm34821	lncRNA	chr7:100171416-100176670	-	1.874504088	3.812315862	3.020530507	1.013475582	0.004098724	0.002651102	-2.69054833	0.023923917	predicted gene, 34821	http://www.ncbi.nlm.nih.gov/gene/?term=102638204
Gm51934	lncRNA	chr11:4118349-4126573	+	2.846599755	1.867856831	4.023836354	0.001513815	0.004098788	1.023705549	-2.691058862	0.023958418	predicted gene, 51934	http://www.ncbi.nlm.nih.gov/gene/?term=115487830
Gm33345	lncRNA	chr5:67405476-67419804	+	2.846599755	1.867856831	4.023836354	0.001513815	0.004098788	1.023705549	-2.691059438	0.023960594	predicted gene, 33345	http://www.ncbi.nlm.nih.gov/gene/?term=102636213
Gdf7	protein_coding	chr12:8297918-8301954	-	1.874499917	2.838469258	4.023836321	0.001513815	0.004098788	1.023705549	-2.691031225	0.023963509	growth differentiation factor 7	http://www.ncbi.nlm.nih.gov/gene/?term=238057
Gm13025	lncRNA	chr4:140679745-140686111	+	0	0	1.005058941	5.072390562	2.124370613	2.080035639	2.847585462	0.024130047	predicted gene 13025	http://www.ncbi.nlm.nih.gov/gene/?term=102637546
Gm51438	lncRNA	chr5:3928589-3948109	+	0	0	1.005058941	1.033552107	4.175382224	4.112933633	2.848578094	0.024218571	predicted gene, 51438	http://www.ncbi.nlm.nih.gov/gene/?term=115486294
Cd93	protein_coding	chr2:148436651-148443535	-	2.838872208	1.860748439	5.028133174	2.078059276	10.44523643	12.31619086	1.323653787	0.024221816	CD93 antigen	http://www.ncbi.nlm.nih.gov/gene/?term=17064
Gm40588	lncRNA	chr12:112816211-112817687	-	3.821780074	3.812326522	1.012341874	1.013475582	0.004098724	0.002651102	-2.689173844	0.024444107	predicted gene, 40588	http://www.ncbi.nlm.nih.gov/gene/?term=105245090
Emx1	protein_coding	chr6:85187931-85204463	+	0	0.960342568	0.000543223	3.055432194	1.091793189	5.127209814	2.848397589	0.024496325	empty spiracles homeobox 1	http://www.ncbi.nlm.nih.gov/gene/?term=13796
Omg	protein_coding	chr11:79500982-79504082	-	6.639907147	1.786606643	13.06717568	3.052483165	2.117306555	3.092247689	-1.331219014	0.024618902	oligodendrocyte myelin glycoprotein	http://www.ncbi.nlm.nih.gov/gene/?term=18377
Gm26615	lncRNA	chr4:133083435-133087054	+	0	0	2.009129793	4.070448046	4.192305283	3.107297829	2.344098683	0.024799462	predicted gene, 26615	http://www.ncbi.nlm.nih.gov/gene/?term=102640635
Gm52526	lncRNA	chr2:134527820-134529954	+	0.886527239	5.725548617	6.034843603	1.019506748	1.053327892	1.034307155	-1.900289538	0.024936951	predicted gene, 52526	http://www.ncbi.nlm.nih.gov/gene/?term=115489475
Stmn1-rs1	transcribed_pseudogene	chr9:115281092-115282070	-	0	0.951260362	1.006211416	4.070446772	2.137863005	5.139007722	2.344286247	0.024946078	stathmin 1, related sequence 1	http://www.ncbi.nlm.nih.gov/gene/?term=111186
2900024J01Rik	lncRNA	chr1:180777961-180792629	+	2.83140492	3.794581478	4.026097672	2.024408756	0.008187955	0.005295985	-2.17553407	0.025001764	RIKEN cDNA 2900024J01 gene, transcript variant X1	http://www.ncbi.nlm.nih.gov/gene/?term=102634584
Angptl7	protein_coding	chr4:148495181-148500462	-	2.83140492	3.794581478	4.026097672	0.003024091	0.008188208	2.042911768	-2.175305519	0.025001822	angiopoietin-like 7	http://www.ncbi.nlm.nih.gov/gene/?term=654812
2410080I02Rik	lncRNA	chr19:23134498-23137111	+	1.874508258	4.788224914	2.016819656	5.110378807	12.47220702	5.194057257	1.347212176	0.025136748	RIKEN cDNA 2410080I02 gene	http://www.ncbi.nlm.nih.gov/gene/?term=102636896
Faim2	protein_coding	chr15:99497005-99534880	-	0	1.928225196	0.001085222	4.070448683	5.215868118	2.088707413	2.345225219	0.025175466	Fas apoptotic inhibitory molecule 2	http://www.ncbi.nlm.nih.gov/gene/?term=72393
Gm24407	snRNA	chr5:115490254-115490394	+	4.763460139	6.701559627	1.015254111	1.019506589	0.012268104	2.049357516	-1.897619542	0.025336245	U4 spliceosomal RNA	http://www.ncbi.nlm.nih.gov/gene/?term=115490316
Mir7035	ncRNA	chr5:136105522-136105603	+	2.871722984	1.890803596	1.009955401	5.099822964	6.298465667	7.207972897	1.617620069	0.02545881	microRNA 7035	http://www.ncbi.nlm.nih.gov/gene/?term=102465626
Art5	protein_coding	chr7:102096879-102100291	-	1.861205132	5.744905941	3.022574637	1.016656607	0.008188082	1.029294862	-2.174890537	0.025543684	ADP-ribosyltransferase 5	http://www.ncbi.nlm.nih.gov/gene/?term=11875
Cckar	protein_coding	chr5:53698485-53707704	-	0	1.917680536	1.007245656	3.066321156	2.150672815	8.192997806	2.073609874	0.025607288	cholecystokinin A receptor	http://www.ncbi.nlm.nih.gov/gene/?term=12425
Mir6403	ncRNA	chr4:134567723-134567851	-	1.931836137	0	0.001085229	5.079098976	1.103026891	5.139005549	2.344429052	0.02592643	microRNA 6403	http://www.ncbi.nlm.nih.gov/gene/?term=102465216
Gm52213	lncRNA	chr15:10419415-10422200	-	1.861205132	5.744905941	3.022574637	11.1748816	11.47724758	3.165348316	1.249396933	0.02618432	predicted gene, 52213	http://www.ncbi.nlm.nih.gov/gene/?term=115488526
Tcp11	protein_coding	chr17:28066747-28080726	-	6.663941649	8.595284129	3.029793244	3.046198065	2.102337388	1.047443847	-1.512632082	0.026210825	t-complex protein 11	http://www.ncbi.nlm.nih.gov/gene/?term=21463
Gm42147	lncRNA	chr5:107737629-107741264	-	1.874512428	5.765582172	1.012341832	0.001513845	1.036860298	0.002651195	-2.687771458	0.02637688	predicted gene, 42147	http://www.ncbi.nlm.nih.gov/gene/?term=105246954
Snord58b	snoRNA	chr18:75001068-75001122	+	0	0	1.005058941	4.064259588	5.197533529	0.02364196	2.848109177	0.02640853	small nucleolar RNA, C/D box 58B	http://www.ncbi.nlm.nih.gov/gene/?term=100217457
Atp1b4	protein_coding	chrX:38316122-38336784	+	0.962332817	0	0.000543225	4.064259588	5.197533529	0.02364196	2.849349656	0.026430957	ATPase, (Na+)/K+ transporting, beta 4 polypeptide	http://www.ncbi.nlm.nih.gov/gene/?term=67821
1700019D03Rik	protein_coding	chr1:52922324-52992657	-	5.705461159	0.859244281	10.05185907	3.042807216	0.020399646	2.060710762	-1.608846573	0.026654446	RIKEN cDNA 1700019D03 gene	http://www.ncbi.nlm.nih.gov/gene/?term=67080
G630016G05Rik	lncRNA	chr2:116067225-116085911	+	2.87171933	0.921941275	2.013888054	2.063908437	8.337488089	7.202513725	1.537085906	0.02694171	RIKEN cDNA G630016G05 gene	http://www.ncbi.nlm.nih.gov/gene/?term=108168785
Gm46220	lncRNA	chr10:38059341-38063357	+	3.796901586	2.814831215	5.030506712	9.160320456	9.437642121	8.26538936	1.183184182	0.027198202	predicted gene, 46220	http://www.ncbi.nlm.nih.gov/gene/?term=108167804
Adgrv1	protein_coding	chr13:81095068-81633391	-	1.848594387	6.701534714	4.02822329	6.131068576	10.46219371	10.29760964	1.071736945	0.028021103	adhesion G protein-coupled receptor V1	http://www.ncbi.nlm.nih.gov/gene/?term=110789
Dnajc28	protein_coding	chr16:91614257-91618999	-	3.752812504	1.809645286	12.05891476	15.24105261	9.505887665	11.36008301	1.034533084	0.028028851	DnaJ heat shock protein family (Hsp40) member C28	http://www.ncbi.nlm.nih.gov/gene/?term=246738
Gm11541	protein_coding	chr11:94694498-94704499	-	0.962332817	0	0.000543225	6.080036334	0.036551206	3.097433079	2.846754226	0.028308969	predicted gene 11541	http://www.ncbi.nlm.nih.gov/gene/?term=432589
Foxf1	protein_coding	chr8:121084386-121088154	+	3.830680204	2.846916697	1.01157097	10.1500994	6.314093528	4.166389197	1.373651649	0.02834008	forkhead box F1	http://www.ncbi.nlm.nih.gov/gene/?term=15227
Gm10840	protein_coding	chr11:106159388-106161159	+	4.780589697	2.822478136	3.022574739	15.20728722	4.290934624	6.225877554	1.247966785	0.028341196	predicted gene 10840	http://www.ncbi.nlm.nih.gov/gene/?term=115487818
Gm26650	protein_coding	chr14:4749900-4930447	-	0	0	0	0.010524229	7.215803004	0.018432351	4.350673702	0.029242869	predicted gene, 26650, transcript variant X5	http://www.ncbi.nlm.nih.gov/gene/?term=105245668
Arl14epl	protein_coding	chr18:46921812-46934222	+	0	0	0	6.072272945	0.028493306	1.051428037	4.336874011	0.029242869	ADP-ribosylation factor-like 14 effector protein-like	http://www.ncbi.nlm.nih.gov/gene/?term=381142
Lef1	protein_coding	chr3:131110297-131224357	+	6.779508899	0	0.003777092	0	0	0	-4.245589514	0.029242869	lymphoid enhancer binding factor 1	http://www.ncbi.nlm.nih.gov/gene/?term=16842
Cox4i2	protein_coding	chr2:152753916-152765039	+	0.953708259	0	1.006211423	2.055121495	11.359231	0.033998275	2.584493405	0.029356805	cytochrome c oxidase subunit 4I2	http://www.ncbi.nlm.nih.gov/gene/?term=84682
LOC115486438	lncRNA	chr13:54485906-54504314	-	6.689314382	3.754541713	5.034874646	2.034536859	1.067306745	2.060711688	-1.517818038	0.029711305	uncharacterized LOC115486438	http://www.ncbi.nlm.nih.gov/gene/?term=115486438
Gm35838	lncRNA	chr19:6992457-6993046	+	3.707417676	11.46461784	9.058271483	4.067406259	5.206857615	1.06267867	-1.199071685	0.029798672	predicted gene, 35838	http://www.ncbi.nlm.nih.gov/gene/?term=102639551
Gm32581	lncRNA	chr4:109078830-109081224	+	0	3.803280836	6.031090367	9.151298729	4.278266402	10.28109476	1.261699117	0.030017292	predicted gene, 32581	http://www.ncbi.nlm.nih.gov/gene/?term=102635178
C330022C24Rik	lncRNA	chr7:140837221-140845689	-	4.731751121	7.63873312	4.032169863	2.034537446	3.11684199	0.013194918	-1.602567933	0.030099156	RIKEN cDNA C330022C24 gene	http://www.ncbi.nlm.nih.gov/gene/?term=78520
Il17c	protein_coding	chr8:122422020-122423639	+	6.617180446	4.658163611	13.07103688	2.04801697	2.131216075	6.147063986	-1.200863782	0.030624486	interleukin 17C	http://www.ncbi.nlm.nih.gov/gene/?term=234836
Gm22980	snoRNA	chr4:117154093-117154162	-	1.830657008	6.672812995	7.041541266	3.042807896	2.094313669	0.013194461	-1.518625054	0.031219389	small nucleolar RNA SNORD38	http://www.ncbi.nlm.nih.gov/gene/?term=115490044
4930568A12Rik	lncRNA	chr1:34477167-34499058	-	16.29340529	9.43996639	7.059693669	2.059591802	3.194966537	10.23250288	-1.067015335	0.031672578	RIKEN cDNA 4930568A12 gene, transcript variant X4	http://www.ncbi.nlm.nih.gov/gene/?term=75883
Gm31954	lncRNA	chr11:68399407-68408834	+	0.962332817	0	0.000543225	7.087322158	1.091790013	1.059024883	2.846265718	0.031779378	predicted gene, 31954, transcript variant X4	http://www.ncbi.nlm.nih.gov/gene/?term=102634353
Sned1	protein_coding	chr1:93235796-93301065	+	2.817080619	3.777927221	6.034843699	12.18980211	6.364939356	9.286897208	1.124332783	0.03234672	sushi, nidogen and EGF-like domains 1	http://www.ncbi.nlm.nih.gov/gene/?term=208777
Spon1	protein_coding	chr7:113765998-114043375	+	5.68965686	4.701885925	8.048231804	1.029236467	3.13488709	3.0868487	-1.303412807	0.032718169	spondin 1, (f-spondin) extracellular matrix protein	http://www.ncbi.nlm.nih.gov/gene/?term=233744
4930550C14Rik	protein_coding	chr9:53402713-53434426	+	5.68965686	4.701885925	8.048231804	1.029236164	2.109980111	4.10119832	-1.303513789	0.032844277	RIKEN cDNA 4930550C14 gene	http://www.ncbi.nlm.nih.gov/gene/?term=75311
Duox2	protein_coding	chr2:122279246-122298740	-	2.817062323	0.880523852	9.043610579	0.004530928	1.053328238	2.049358159	-1.906069392	0.033524022	dual oxidase 2	http://www.ncbi.nlm.nih.gov/gene/?term=214593
Gm32422	lncRNA	chr5:121838161-121839260	+	0	1.928225196	0.001085222	8.102334642	2.137858587	1.066242785	2.343673259	0.033530383	predicted gene, 32422	http://www.ncbi.nlm.nih.gov/gene/?term=102634970
Igf2bp1	protein_coding	chr11:95957163-96005944	-	2.880965246	0.928630681	1.009099789	4.084468394	10.37114537	2.108652034	1.698130193	0.034004377	insulin-like growth factor 2 mRNA binding protein 1	http://www.ncbi.nlm.nih.gov/gene/?term=140486
Gm22935	snRNA	chr3:89097910-89098013	-	9.531083776	11.45523099	4.040061064	3.06103653	4.192306663	4.123819222	-1.12048227	0.034032455	U6 spliceosomal RNA	http://www.ncbi.nlm.nih.gov/gene/?term=115489782
Gm4070	protein_coding	chr7:105895118-105953967	-	1.861200339	4.768943121	4.026097635	6.125887115	6.343814455	12.31617141	1.190888914	0.034075653	predicted gene 4070	http://www.ncbi.nlm.nih.gov/gene/?term=100042856
Gm32374	lncRNA	chr5:64992391-65020132	-	4.755215639	3.769948368	5.032745414	0.006034308	2.085810119	2.055240111	-1.627698681	0.034123234	predicted gene, 32374, transcript variant X2	http://www.ncbi.nlm.nih.gov/gene/?term=102634899
LOC115487638	snoRNA	chr1:161036057-161036139	+	6.567859174	13.3492894	11.07266686	6.09717741	8.309471903	0.036567439	-1.079270753	0.034160267	small nucleolar RNA SNORD24	http://www.ncbi.nlm.nih.gov/gene/?term=115487638
Gdf11	protein_coding	chr10:128880524-128891718	-	2.846609317	3.812321192	2.016819682	7.12730476	10.41872248	4.17068612	1.280636526	0.03418012	growth differentiation factor 11	http://www.ncbi.nlm.nih.gov/gene/?term=14561
1700102H20Rik	lncRNA	chr17:3557824-3559863	+	1.896294247	1.89080043	2.013888035	0	0	0	-4.044176642	0.034190966	RIKEN cDNA 1700102H20 gene	http://www.ncbi.nlm.nih.gov/gene/?term=68230
Nfe2	protein_coding	chr15:103248212-103258403	-	1.896294247	1.89080043	2.013888035	0	0	0	-4.044176657	0.034191613	nuclear factor, erythroid derived 2	http://www.ncbi.nlm.nih.gov/gene/?term=18022
Gm35714	lncRNA	chr16:90197313-90203802	-	3.781519522	3.769941288	6.036023876	0.006034308	2.085810119	2.055240111	-1.62805182	0.034320792	predicted gene, 35714, transcript variant X1	http://www.ncbi.nlm.nih.gov/gene/?term=102639388
Gm6961	lncRNA	chr15:95747247-95751591	-	0	0	0	1.026971653	2.102338833	3.081194889	4.132590614	0.034328094	predicted gene 6961	http://www.ncbi.nlm.nih.gov/gene/?term=629300
Gm7030	protein_coding	chr17:36127609-36129425	-	0	0	0	1.026971922	3.126101481	2.065873977	4.132887851	0.034341209	predicted gene 7030	http://www.ncbi.nlm.nih.gov/gene/?term=630294
Gm52106	lncRNA	chr14:30072993-30094903	+	1.861214717	7.700161415	1.013827633	0.003024209	2.066671278	0.005296355	-2.169296801	0.034593517	predicted gene, 52106	http://www.ncbi.nlm.nih.gov/gene/?term=115488310
Clhc1	protein_coding	chr11:29547950-29578360	+	1.830663241	7.648294589	6.038297177	0.007533805	0.020400584	5.100431815	-1.518356957	0.034787044	clathrin heavy chain linker domain containing 1	http://www.ncbi.nlm.nih.gov/gene/?term=73324
Gm14488	lncRNA	chr2:30713147-30721187	-	3.83996785	0.915522807	2.014905361	8.130129814	2.186216755	9.243468779	1.483346122	0.034816714	predicted gene 14488	http://www.ncbi.nlm.nih.gov/gene/?term=100038700
Gm32675	lncRNA	chr6:145914270-145928596	+	2.871722984	1.890803596	1.009955401	0	0	0	-4.043068837	0.034819302	predicted gene, 32675, transcript variant X1	http://www.ncbi.nlm.nih.gov/gene/?term=102635298
Gm28707	lncRNA	chr13:42047013-42050567	+	2.871722984	1.890803596	1.009955401	0	0	0	-4.043067733	0.034823532	predicted gene 28707	http://www.ncbi.nlm.nih.gov/gene/?term=108168079
Kcnq1	protein_coding	chr7:143106877-143427050	+	1.896291095	0.921938735	3.017159555	0	0	0	-4.045401918	0.034926012	potassium voltage-gated channel, subfamily Q, member 1	http://www.ncbi.nlm.nih.gov/gene/?term=16535
Gm33126	lncRNA	chr2:32085269-32089609	+	2.81018833	3.769934208	7.039134611	1.022138222	0.016338823	3.068889585	-1.628952826	0.035198828	predicted gene, 33126	http://www.ncbi.nlm.nih.gov/gene/?term=102635909
Slfn14	protein_coding	chr11:83275110-83286726	-	0	0	0	4.054012344	1.07376315	1.047442998	4.131296145	0.035743365	schlafen 14	http://www.ncbi.nlm.nih.gov/gene/?term=237890
Gm35202	lncRNA	chr2:35503524-35506092	+	0	0	0	4.054012344	1.07376315	1.047442998	4.131295926	0.035744437	predicted gene, 35202	http://www.ncbi.nlm.nih.gov/gene/?term=108168745
Rab44	protein_coding	chr17:29114128-29148980	+	0	0	0	1.026971383	1.073764902	4.094918419	4.132276193	0.035783788	RAB44, member RAS oncogene family	http://www.ncbi.nlm.nih.gov/gene/?term=442827
Gm46689	lncRNA	chrX:93817719-93827308	-	0	0	0	1.026971383	1.073764902	4.094918419	4.132276188	0.035784235	predicted gene, 46689	http://www.ncbi.nlm.nih.gov/gene/?term=108168484
Gm46126	lncRNA	chr9:98297197-98299654	-	0	0	0	1.026971383	1.073764902	4.094918419	4.132276154	0.035786891	predicted gene, 46126	http://www.ncbi.nlm.nih.gov/gene/?term=108167677
Muc5b	protein_coding	chr7:141839059-141873089	+	0.925861546	3.841757076	1.00995537	0	0	0	-4.042452004	0.036676913	mucin 5, subtype B, tracheobronchial	http://www.ncbi.nlm.nih.gov/gene/?term=74180
Itga3	protein_coding	chr11:95044475-95076844	-	0.925861546	3.841757076	1.00995537	0	0	0	-4.042450444	0.036682891	integrin alpha 3	http://www.ncbi.nlm.nih.gov/gene/?term=16400
Gm52252	lncRNA	chr16:30520129-30529418	+	0.925861546	3.841757076	1.00995537	0	0	0	-4.042449306	0.036687257	predicted gene, 52252	http://www.ncbi.nlm.nih.gov/gene/?term=115488646
Opn1sw	protein_coding	chr6:29376671-29380513	-	2.871715677	0	3.017159577	0	0	0	-4.046097207	0.036963196	opsin 1 (cone pigments), short-wave-sensitive (color blindness, tritan)	http://www.ncbi.nlm.nih.gov/gene/?term=12057
Gm51906	lncRNA	chr11:72563817-72607163	-	2.871715677	0	3.017159577	0	0	0	-4.046098696	0.036968199	predicted gene, 51906, transcript variant X1	http://www.ncbi.nlm.nih.gov/gene/?term=115487786
Gm30908	lncRNA	chr2:166471463-166473959	+	0	2.864912616	3.01715951	0	0	0	-4.045861298	0.036994005	predicted gene, 30908, transcript variant X2	http://www.ncbi.nlm.nih.gov/gene/?term=102632966
Gm5878	lncRNA	chr6:85111415-85126094	-	0	0	0	4.054011916	0.024451358	2.065870824	4.130466692	0.037259234	predicted gene 5878	http://www.ncbi.nlm.nih.gov/gene/?term=545861
Gm8350	misc_RNA	chr5:106557732-106578906	-	0	0	0	0.009030744	4.147397549	2.065875029	4.134306508	0.037370685	predicted gene 8350	http://www.ncbi.nlm.nih.gov/gene/?term=666892
Gm5544	protein_coding	chr3:97930173-97967018	+	8.673668861	0.88055127	3.024502527	0.00453084	0.012268293	3.062045465	-1.897714411	0.037860087	predicted gene 5544	http://www.ncbi.nlm.nih.gov/gene/?term=433632
Gm34407	lncRNA	chr12:12284555-12289340	-	0	3.84175298	2.013887996	0	0	0	-4.044068676	0.038416247	predicted gene, 34407	http://www.ncbi.nlm.nih.gov/gene/?term=102637648
Dusp27	protein_coding	chr1:166098148-166127898	-	3.849726103	0	2.013888074	0	0	0	-4.044461387	0.038425796	dual specificity phosphatase 27 (putative)	http://www.ncbi.nlm.nih.gov/gene/?term=240892
Gm37762	lncRNA	chr14:69201500-69221613	-	0	1.917680536	1.007245656	3.063714404	4.200381323	5.144629226	1.961708552	0.038436837	predicted gene, 37762, transcript variant X3	http://www.ncbi.nlm.nih.gov/gene/?term=105245802
Pard6g	protein_coding	chr18:80046830-80119640	+	2.824151741	4.759782793	4.02717549	0.004531016	2.076674964	1.034307658	-1.787170946	0.038602437	par-6 family cell polarity regulator gamma	http://www.ncbi.nlm.nih.gov/gene/?term=93737
Mir484	ncRNA	chr16:14159626-14159692	+	1.896300552	3.841761171	0.003241087	0	0	0	-4.039875522	0.038613985	microRNA 484	http://www.ncbi.nlm.nih.gov/gene/?term=723916
Gm39478	lncRNA	chr11:117257273-117266184	-	2.901486079	0	0.001626017	4.073398023	3.1740219	5.144626927	1.961892088	0.038851165	predicted gene, 39478	http://www.ncbi.nlm.nih.gov/gene/?term=105243612
Gm45915	protein_coding	chr14:25603513-25605636	+	1.896287941	0	4.020091747	5.097061876	5.265015156	7.202504027	1.535804888	0.038871456	predicted gene, 45915	http://www.ncbi.nlm.nih.gov/gene/?term=100188919
Wdr93	protein_coding	chr7:79742948-79785952	+	1.867751629	3.803292248	4.024986115	7.130184207	8.380425364	7.228821273	1.199951102	0.039394393	WD repeat domain 93	http://www.ncbi.nlm.nih.gov/gene/?term=626359
Gm36518	lncRNA	chr4:132948422-132960681	-	1.854811081	3.786128232	6.033630621	1.019506908	2.076674523	0.007935225	-1.788232626	0.0394327	predicted gene, 36518, transcript variant X4	http://www.ncbi.nlm.nih.gov/gene/?term=102640462
Gm23301	snoRNA	chr18:75001455-75001519	+	2.838882459	3.803297952	3.021569074	7.130181805	6.329195367	9.260449552	1.200045866	0.03946808	small nucleolar RNA SNORD58	http://www.ncbi.nlm.nih.gov/gene/?term=115488997
Mt3	protein_coding	chr8:94152607-94154148	+	8.634082533	2.779335977	5.035904138	2.037470861	2.102338111	2.065872926	-1.356417422	0.039503603	metallothionein 3	http://www.ncbi.nlm.nih.gov/gene/?term=17751
Lhx9	protein_coding	chr1:138825186-138848839	-	0	2.864912616	3.01715951	3.07618776	6.290420787	8.217337375	1.536394458	0.039610427	LIM homeobox protein 9	http://www.ncbi.nlm.nih.gov/gene/?term=16876
Grin1os	lncRNA	chr2:25291258-25298660	+	0	0	3.013181791	6.090633183	4.200376941	2.092867539	1.960260862	0.039689302	glutamate receptor, ionotropic, NMDA1 (zeta 1), opposite strand	http://www.ncbi.nlm.nih.gov/gene/?term=320354
Agrp	protein_coding	chr8:105566695-105579845	-	3.849726103	0	2.013888074	8.123670522	3.208194717	6.186984	1.53596024	0.039691646	agouti related neuropeptide	http://www.ncbi.nlm.nih.gov/gene/?term=11604
Gm30744	lncRNA	chr1:132321429-132324503	-	10.52401441	5.634172777	7.050231641	3.058279403	3.159141664	4.118465788	-1.140814244	0.039759233	predicted gene, 30744	http://www.ncbi.nlm.nih.gov/gene/?term=102632755
Adam1a	protein_coding	chr5:121518604-121521695	-	0.945996516	0	2.010465706	6.090630844	1.108470308	5.144622329	1.960251194	0.040032407	a disintegrin and metallopeptidase domain 1a	http://www.ncbi.nlm.nih.gov/gene/?term=280668
Entpd2	protein_coding	chr2:25395874-25401323	+	10.52404281	7.576834356	5.042599599	3.058280488	5.206859019	2.084436097	-1.140102454	0.040219665	ectonucleoside triphosphate diphosphohydrolase 2	http://www.ncbi.nlm.nih.gov/gene/?term=12496
Mir1839	ncRNA	chr7:81529916-81529988	+	12.45025103	8.524520135	5.045254301	6.090630844	1.108470308	5.144622329	-1.053085252	0.040367066	microRNA 1839	http://www.ncbi.nlm.nih.gov/gene/?term=100316717
Twist2	protein_coding	chr1:91801461-91848034	+	4.702613356	8.576608732	7.047120181	5.06884446	2.117304788	1.055283274	-1.261199411	0.040496197	twist basic helix-loop-helix transcription factor 2	http://www.ncbi.nlm.nih.gov/gene/?term=13345
Bcam	protein_coding	chr7:19756138-19770532	-	6.716583665	2.807412136	3.024502452	5.117853808	7.378344072	13.33643733	1.016114554	0.040720693	basal cell adhesion molecule	http://www.ncbi.nlm.nih.gov/gene/?term=57278
Slc22a18	protein_coding	chr7:143473726-143499334	+	11.43962491	10.43654677	8.060841264	6.097174832	5.241351417	3.121083221	-1.033748398	0.040931468	solute carrier family 22 (organic cation transporter), member 18	http://www.ncbi.nlm.nih.gov/gene/?term=18400
Fosb	protein_coding	chr7:19302696-19310118	-	257.5204425	934.7221229	1275.156755	161.5223991	183.3277369	759.2986228	-1.160508412	0.041067365	FBJ osteosarcoma oncogene B	http://www.ncbi.nlm.nih.gov/gene/?term=14282
Gm46302	lncRNA	chr11:115773683-115777238	-	0.953708259	0	1.006211423	3.058279403	3.159141664	4.118465788	2.211615906	0.041748568	predicted gene, 46302, transcript variant X3	http://www.ncbi.nlm.nih.gov/gene/?term=108167939
Ushbp1	protein_coding	chr8:71384274-71395834	-	1.931836137	0	0.001085229	4.067405061	3.15914049	3.102445485	2.211977318	0.041999391	USH1 protein network component harmonin binding protein 1	http://www.ncbi.nlm.nih.gov/gene/?term=234395
B4galnt2	protein_coding	chr11:95863559-95914960	-	3.849726103	0	2.013888074	3.076186213	4.237847963	10.24541712	1.53649702	0.042264877	beta-1,4-N-acetyl-galactosaminyl transferase 2	http://www.ncbi.nlm.nih.gov/gene/?term=14422
Fhad1os2	lncRNA	chr4:141881281-141900288	+	0.953708259	0	1.006211423	3.058280488	5.206859019	2.084436097	2.211887963	0.04230415	forkhead-associated (FHA) phosphopeptide binding domain 1, opposite strand 2, transcript variant X2	http://www.ncbi.nlm.nih.gov/gene/?term=102638933
Ccr3	protein_coding	chr9:124017825-124031692	+	2.838877333	2.830339251	4.02498615	0.003024209	2.066671278	0.005296355	-2.042582455	0.042352552	chemokine (C-C motif) receptor 3	http://www.ncbi.nlm.nih.gov/gene/?term=12771
Gm52212	lncRNA	chr15:84216487-84217270	-	4.789583178	2.830349545	2.017728934	1.016656724	1.045537996	0.00529617	-2.041833509	0.042492132	predicted gene, 52212	http://www.ncbi.nlm.nih.gov/gene/?term=115488523
Gm30504	lncRNA	chr8:45110486-45343736	+	0	0	1.005058941	4.060991472	2.117305672	2.075495265	2.68481161	0.042565853	predicted gene, 30504, transcript variant X1	http://www.ncbi.nlm.nih.gov/gene/?term=102632429
Slc4a9	protein_coding	chr18:36528066-36556272	+	1.931836137	0	0.001085229	3.058280488	5.206859019	2.084436097	2.212468164	0.042638908	solute carrier family 4, sodium bicarbonate cotransporter, member 9	http://www.ncbi.nlm.nih.gov/gene/?term=240215
4930405A21Rik	lncRNA	chr2:156714539-156720909	-	6.73606669	0.891694008	3.022574806	6.125884712	4.284657166	14.34423401	1.19088265	0.042639845	RIKEN cDNA 4930405A21 gene	http://www.ncbi.nlm.nih.gov/gene/?term=74846
Pou3f1	protein_coding	chr4:124657646-124660655	+	2.838872208	1.860748439	5.028133174	1.016656724	1.045537996	0.00529617	-2.043471392	0.042656196	POU domain, class 3, transcription factor 1	http://www.ncbi.nlm.nih.gov/gene/?term=18991
Tmem198	protein_coding	chr1:75479532-75485693	+	4.771903616	5.735106626	1.014547428	3.091882852	7.370822493	14.3442495	1.072187132	0.042876114	transmembrane protein 198	http://www.ncbi.nlm.nih.gov/gene/?term=319998
4930403D09Rik	lncRNA	chr11:34299742-34308386	+	0.962332817	0	0.000543225	3.052484098	4.166452023	1.055285386	2.686062478	0.043070632	RIKEN cDNA 4930403D09 gene	http://www.ncbi.nlm.nih.gov/gene/?term=319208
Zc3h12b	protein_coding	chrX:95711583-95932656	+	1.88147643	1.875201108	4.022642548	1.013475582	0.004098724	0.002651102	-2.529087235	0.043085038	zinc finger CCCH-type containing 12B	http://www.ncbi.nlm.nih.gov/gene/?term=547176
Tns1	protein_coding	chr1:73910232-74124548	-	0	0	1.005058941	1.031425846	4.166454261	3.092250631	2.685642696	0.043091979	tensin 1	http://www.ncbi.nlm.nih.gov/gene/?term=21961
Ifitm10	protein_coding	chr7:142325835-142373779	-	0.913868146	3.821687722	3.019453991	0.001513815	0.004098788	1.023705549	-2.528150721	0.043546293	interferon induced transmembrane protein 10	http://www.ncbi.nlm.nih.gov/gene/?term=320802
Gm26512	lncRNA	chr12:90738100-90812245	+	2.854610781	0.909315653	4.022642578	0.001513815	0.004098788	1.023705549	-2.529069773	0.043604208	predicted gene, 26512, transcript variant X5	http://www.ncbi.nlm.nih.gov/gene/?term=102637693
Gm46068	lncRNA	chr8:34583456-34585026	-	0	0.943140845	2.010465694	8.106141306	3.17401659	1.069741245	1.959508469	0.043701657	predicted gene, 46068	http://www.ncbi.nlm.nih.gov/gene/?term=108167580
Sycp3	protein_coding	chr10:88459587-88473236	+	0.953709362	0.95126147	0.001085226	3.058278319	1.09747396	6.147061799	2.211864675	0.043896745	synaptonemal complex protein 3	http://www.ncbi.nlm.nih.gov/gene/?term=20962
Pkp3	protein_coding	chr7:141078229-141090511	+	0	0.960342568	0.000543223	5.06884446	2.117304788	1.055283274	2.685276742	0.044113368	plakophilin 3	http://www.ncbi.nlm.nih.gov/gene/?term=56460
Gm25636	snoRNA	chr7:110023210-110023342	+	0.962332817	0	0.000543225	1.031426181	5.187853503	2.075499121	2.686900896	0.044286056	small nucleolar RNA SNORA13	http://www.ncbi.nlm.nih.gov/gene/?term=115486823
Terc	telomerase_RNA	chr3:96414437-96414833	-	0.913861866	1.875197247	5.025587765	1.013475582	0.004098724	0.002651102	-2.53068926	0.045119692	telomerase RNA component	http://www.ncbi.nlm.nih.gov/gene/?term=21748
4933406J10Rik	lncRNA	chr7:82743346-82755644	-	0	0	0	1.026971114	0.02445248	5.107645649	4.1311189	0.045676882	RIKEN cDNA 4933406J10 gene	http://www.ncbi.nlm.nih.gov/gene/?term=77800
C230072F16Rik	lncRNA	chr17:80896793-80933447	+	2.831399461	2.822467172	5.02933874	7.133019549	9.4129641	7.233812346	1.130354139	0.045931488	RIKEN cDNA C230072F16 gene	http://www.ncbi.nlm.nih.gov/gene/?term=320784
Gm19325	lncRNA	chr9:97048161-97055209	-	0	2.874648597	2.012818945	4.081796034	7.296913403	4.143789419	1.60577631	0.045941399	predicted gene, 19325, transcript variant X1	http://www.ncbi.nlm.nih.gov/gene/?term=100502694
Zfp108	protein_coding	chr7:24254726-24262445	+	3.80492506	2.822472654	4.02609771	9.15130008	5.308413311	9.265903491	1.13019835	0.046189566	zinc finger protein 108	http://www.ncbi.nlm.nih.gov/gene/?term=54678
Gm51715	lncRNA	chr9:88582990-88586091	-	5.722020708	2.793061145	6.037174286	1.024614641	4.137101781	0.013195376	-1.427062406	0.046680361	predicted gene, 51715	http://www.ncbi.nlm.nih.gov/gene/?term=115487231
Gm13889	protein_coding	chr2:93955810-93957100	-	23.98763975	15.16660433	6.065866152	12.16953478	7.347501508	2.126917339	-1.048425989	0.047111163	predicted gene 13889	http://www.ncbi.nlm.nih.gov/gene/?term=620695
Mgat4e	protein_coding	chr1:134540941-134561746	-	4.747231683	7.658144907	2.021938935	1.024614406	3.116842725	1.043295167	-1.425400077	0.04711609	MGAT4 family, member E	http://www.ncbi.nlm.nih.gov/gene/?term=71001
Gm42111	lncRNA	chr5:92061097-92063330	-	6.698159001	1.827879446	6.037174339	3.042807216	0.020399646	2.060710762	-1.427851656	0.047149066	predicted gene, 42111	http://www.ncbi.nlm.nih.gov/gene/?term=105246915
Mdrl	lncRNA	chrX:36814768-36817200	-	2.824163303	6.711650372	2.019472025	5.112904925	8.388569236	10.28111246	1.009877262	0.047196045	mitochondrial dynamic related lncRNA	http://www.ncbi.nlm.nih.gov/gene/?term=69591
Erich6	protein_coding	chr3:58616300-58637220	-	0	0	1.005058941	0.013500281	9.275862252	0.023645211	2.853817994	0.047354003	glutamate rich 6	http://www.ncbi.nlm.nih.gov/gene/?term=545527
Mgarp	protein_coding	chr3:51388412-51396547	-	7.614162131	7.593699859	6.044572975	2.045519854	3.151352616	4.112931872	-1.163599407	0.04737948	mitochondria localized glutamic acid rich protein	http://www.ncbi.nlm.nih.gov/gene/?term=67749
4932702P03Rik	lncRNA	chr13:24905600-24911780	+	2.854606357	0	5.025587831	0.001513815	0.004098788	1.023705549	-2.531435885	0.047573896	RIKEN cDNA 4932702P03 gene	http://www.ncbi.nlm.nih.gov/gene/?term=73326
Gm31888	lncRNA	chr5:35720200-35722320	+	7.59032076	11.46467828	5.043496377	5.079101736	5.215866625	1.066246823	-1.065092624	0.047702534	predicted gene, 31888, transcript variant X2	http://www.ncbi.nlm.nih.gov/gene/?term=102634261
Gm38804	lncRNA	chr6:48611021-48614414	-	2.86296391	0.915519956	3.018333196	7.118334036	4.24486828	7.207966201	1.406987596	0.048000591	predicted gene, 38804, transcript variant X1	http://www.ncbi.nlm.nih.gov/gene/?term=105242648
Alkal1	protein_coding	chr1:6359331-6394731	+	3.821774767	2.838478861	2.016819708	7.124365346	4.258552184	9.249236163	1.210949191	0.048215505	ALK and LTK ligand 1	http://www.ncbi.nlm.nih.gov/gene/?term=620393
Scarna6	guide_RNA	chr1:87784571-87784818	+	2.846599755	1.867856831	4.023836354	5.105188033	5.287278464	10.26376791	1.210565861	0.048619022	small Cajal body-specific RNA 6	http://www.ncbi.nlm.nih.gov/gene/?term=100217415
Gm46229	lncRNA	chr10:67304013-67313629	+	0	3.84175298	2.013887996	6.106388498	1.134411441	10.24540604	1.53525987	0.048729168	predicted gene, 46229, transcript variant X2	http://www.ncbi.nlm.nih.gov/gene/?term=108167816
Vmn2r83	protein_coding	chr10:79468958-79492154	+	0.92585143	0	5.022812641	0	0	0	-4.057170529	0.049473489	vomeronasal 2, receptor 83	http://www.ncbi.nlm.nih.gov/gene/?term=625029
Gm38883	lncRNA	chr6:117878802-117881016	-	0.92585143	0	5.022812641	0	0	0	-4.057183551	0.049501281	predicted gene, 38883	http://www.ncbi.nlm.nih.gov/gene/?term=105242751
Gm52331	lncRNA	chr18:77768182-77770211	+	0	0	0	0.009031093	6.185852925	0.015817059	4.139307244	0.049535509	predicted gene, 52331, transcript variant X1	http://www.ncbi.nlm.nih.gov/gene/?term=115488901
Gm41145	lncRNA	chr14:45573820-45582167	-	0	0	0	0.009030046	0.024452854	6.119686595	4.131874464	0.049535509	predicted gene, 41145	http://www.ncbi.nlm.nih.gov/gene/?term=105245746
Gm46604	lncRNA	chr17:11960121-12031400	-	0	0	0	6.068108469	0.02445061	0.015813775	4.126056762	0.049535509	predicted gene, 46604, transcript variant X6	http://www.ncbi.nlm.nih.gov/gene/?term=108168354
Gm35196	lncRNA	chr14:61686786-61690598	-	4.829355475	0.921946353	0.003241117	0	0	0	-4.03639239	0.049535509	predicted gene, 35196, transcript variant X3	http://www.ncbi.nlm.nih.gov/gene/?term=102638697
Gm35279	lncRNA	chr13:98994238-99001471	+	4.829355475	0.921946353	0.003241117	0	0	0	-4.03639239	0.049535509	predicted gene, 35279, transcript variant X3	http://www.ncbi.nlm.nih.gov/gene/?term=102638802
Gm41526	lncRNA	chr17:11123225-11133895	-	0.925864074	4.820299624	0.003241076	0	0	0	-4.035613864	0.049535509	predicted gene, 41526, transcript variant X3	http://www.ncbi.nlm.nih.gov/gene/?term=105246193
Gm32100	lncRNA	chr16:11583706-11588531	+	6.663899978	4.701895202	7.044954669	6.072272945	0.028493306	1.051428037	-1.303973686	0.049636201	predicted gene, 32100	http://www.ncbi.nlm.nih.gov/gene/?term=102634546
