# Supplementary material for: Anti-inflammatory role of low-intensity pulsed ultrasound in inhibiting lipopolysaccharide-induced M1 polarization of RAW264.7 cells via Wnt2b/AXIN/β-catenin
Source: PeerJ journal article supplement (doi:10.7717/peerj.18448), 2024-11-13
Supplement: supplemental_files.zip [file Wnt2B A.xlsx]

## Sheet: Sheet1
Wnt2b		Cp	b-actin Cp	△Ct b-actin	2-△△CT	Normalization
	RAW	25.12	15.86	9.26	0.00163103	0.959264
		25.11	15.88	9.23	0.0016653	0.97942
		25.09	15.92	9.17	0.00173602	1.02101
	RAW+LPS	31.61	20.02	11.59	0.000324386	0.190782
		31.48	20.14	11.34	0.000385762	0.22688
		31.5	20.11	11.39	0.000372622	0.219151
	RAW+LPS+LIPUS	29.44	20.18	9.26	0.00163103	0.959264
		29.48	19.87	9.61	0.00127968	0.752623
		29.15	19.76	9.39	0.00149049	0.876606
	RAW+LIPUS	25.64	16.1	9.54	0.0013433	0.790041
		25.47	15.99	9.48	0.00140035	0.823591
		25.45	15.98	9.47	0.00141009	0.82932
CD80	RAW	25.06	15.86	9.2	0.00170029	1
