# Supplementary material for: Anti-inflammatory role of low-intensity pulsed ultrasound in inhibiting lipopolysaccharide-induced M1 polarization of RAW264.7 cells via Wnt2b/AXIN/β-catenin
Source: PeerJ journal article supplement (doi:10.7717/peerj.18448), 2024-11-13
Supplement: supplemental_files.zip [file Wnt2B B.xlsx]

## Sheet: Sheet1
Wnt2b		Cp	b-actin Cp	△Ct b-actin	2-△△CT	Normalization
	RAW	26.46	16.43	10.03	0.000956465	6.54322
		26.49	16.3	10.19	0.00085606	5.85634
		26.35	16.32	10.03	0.000956465	6.54322
	RAW+IL-4	25.92	16.09	9.83	0.00109869	7.51618
		25.93	16.17	9.76	0.00115331	7.88986
		25.84	16.06	9.78	0.00113744	7.78124
	RAW+IL-4+LIPUS	26.04	16.43	9.61	0.00127968	8.75435
		26.01	16.32	9.69	0.00121065	8.28212
		25.83	16.12	9.71	0.00119398	8.1681
	RAW+LIPUS	25.95	16.01	9.94	0.00101803	6.9644
		25.9	16.26	9.64	0.00125335	8.57419
		25.76	16.12	9.64	0.00125335	8.57419
IL-1β	RAW	29.26	16.52	12.74	0.000146177	1
